# Supplementary material
Source: PubMed Central journal article supplement (PMC4919767)
Supplement: oc6b00139_si_001.pdf [file oc6b00139_si_001.pdf]

## Supporting Information

# Catalytic Oxidation of Methane into Methanol over Copper-Exchanged Zeolites with Oxygen at Low Temperature

Karthik Narsimhan, Kenta Iyoki, Kimberly Dinh, Yuriy Román-Leshkov\*

Department of Chemical Engineering, Massachusetts Institute of Technology, 77 Massachusetts Ave, Cambridge, Massachusetts 02139, United States

\* Correspondence to: [yroman@mit.edu](mailto:yroman@mit.edu)

## Table of Contents

|                                                                                                                                                 |    |
|-------------------------------------------------------------------------------------------------------------------------------------------------|----|
| Materials and Methods.....                                                                                                                      | 2  |
| Materials .....                                                                                                                                 | 2  |
| Zeolite Synthesis.....                                                                                                                          | 2  |
| Ion Exchange .....                                                                                                                              | 3  |
| Incipient Wetness Impregnation .....                                                                                                            | 3  |
| Characterization .....                                                                                                                          | 3  |
| Catalytic CH <sub>4</sub> Oxidation Reactions .....                                                                                             | 5  |
| Section S1: Product Identification for CH <sub>4</sub> Oxidation over Cu-Na-ZSM-5 (Cu/Al = 0.37) .....                                          | 8  |
| Section S2: Simulation of High Conversion CH <sub>4</sub> Oxidation via CH <sub>3</sub> OH Oxidation over Cu-Na-ZSM-5 (Cu/Al = 0.37) .....      | 10 |
| Section S3: Steady-state CH <sub>3</sub> OH Production over Cu-H-ZSM-5 (Cu/Al = 0.31).....                                                      | 14 |
| Section S4: <sup>13</sup> C Isotopically Labelled Control Experiments over Cu-Na-ZSM-5 (Cu/Al = 0.37) .....                                     | 15 |
| Section S5: <sup>13</sup> CO <sub>2</sub> Production during Transient, Isotopically Labelled Experiments over Cu-Na-ZSM-5 (Cu/Al = 0.37) .....  | 16 |
| Section S6: Isotopically Labelled Experiments over Cu-H-ZSM-5 (Cu/Al = 0.31).....                                                               | 18 |
| Section S7: Kinetic Order Dependence of Reactants and Transient, Isotopic Pulsing of CD <sub>4</sub> over Cu-Na-ZSM-5 (Cu/Al = 0.37) .....      | 19 |
| Section S8: Thermal Pretreatments and the Onset of Catalytic Activity over Cu-Na-ZSM-5 (Cu/Al = 0.37).....                                      | 22 |
| Section S9: In-situ Diffuse Reflectance UV-visible Spectroscopy and Online Gas Chromatography Measurements over Cu-Na-ZSM-5 (Cu/Al = 0.37)..... | 24 |
| Section S10: Catalytic CH <sub>4</sub> Oxidation over Cu-ZSM-5 and Cu-MOR Zeolites .....                                                        | 29 |
| Section S11: CH <sub>4</sub> Oxidation vs. Temperature over Cu-Na-SSZ-13 (Cu/Al = 0.50) .....                                                   | 31 |
| Section S12: CH <sub>4</sub> Oxidation over CuO <sub>x</sub> -Zeolites Prepared by Incipient Wetness Impregnation .....                         | 32 |
| Section S13: Materials Characterization.....                                                                                                    | 36 |
| References.....                                                                                                                                 | 40 |

## Materials and Methods

### Materials

**Commercial zeolites.** Zeolites MOR (mordenite, CBV21A, Si/Al = 10), ZSM-5 (MFI, CBV2314, Si/Al = 11.5), BEA (beta, CP814E, Si/Al = 12.5), FER (ferrierite, CP914C, Si/Al = 10), and Y (FAU, CBV100, Si/Al = 5.1) were purchased from Zeolyst International. MCM-41 (Aluminosilicate Al-MCM-41, Si/Al = 12) was purchased from ACS Materials. All zeolites were in the ammonium form except for Y and MCM-41, which were in the sodium form.

### Zeolite Synthesis

**Synthesis of SSZ-13 (CHA):** sodium hydroxide (99.99%, Sigma-Aldrich) was dissolved in H<sub>2</sub>O and mixed with N,N,N-trimethyl-1-adamantanamine hydroxide solution (Ada, 25 wt % in H<sub>2</sub>O, Sachem) followed by the addition of aluminum hydroxide (80.3 wt % Al(OH)<sub>3</sub>, SPI Pharma 0250) to obtain a colorless solution. After the addition of colloidal silicon dioxide (SiO<sub>2</sub>) (Ludox® LS-30), the colorless solution was stirred at room temperature for 2 h. The final composition of the mixture was 0.1 Na<sub>2</sub>O: 0.033 Al<sub>2</sub>O<sub>3</sub>: 1.0 SiO<sub>2</sub>: 44 H<sub>2</sub>O: 0.1 (Ada)<sub>2</sub>O. This mixture was transferred to a 23-mL Teflon-lined stainless steel autoclave (No. 4749, Parr Instruments) and was then subjected to hydrothermal treatment at 433 K for 4 days in an oven under autogenous pressure and rotation (60 rpm). After hydrothermal treatment, the product was separated from the mother liquor by centrifugation, washed several times with distilled H<sub>2</sub>O, and dried at 393 K. SSZ-13 samples were calcined under dry air (Dry Size 300, Airgas) with the following temperature profile: heat 1 K min<sup>-1</sup> to 423 K and hold for 2 h at 423 K, then heat 1 K min<sup>-1</sup> to 623 K and hold for 2 h at 623 K, and lastly heat 1 K min<sup>-1</sup> to 853 K and hold for 10 h.

**Synthesis of SAPO-34 (CHA):** Aluminum oxide (Al<sub>2</sub>O<sub>3</sub>) (Catapal® B) and colloidal silicon dioxide (SiO<sub>2</sub>) (Ludox® AS-40) were added to a mixture of phosphoric acid (85 wt %, Sigma-Aldrich) and H<sub>2</sub>O. Diethylamine (DEA, 99.5%, Sigma-Aldrich) was added to the mixture to obtain a gel with the composition of 0.8 P<sub>2</sub>O<sub>5</sub>: Al<sub>2</sub>O<sub>3</sub>: 0.6 SiO<sub>2</sub>: 50 H<sub>2</sub>O: 2 DEA. The mixture was stirred for 0.5 h and then subjected to hydrothermal treatment at 423 K for 7 days with 60 rpm rotation. After hydrothermal treatment, the product was separated from the mother liquor by centrifugation, washed several times with distilled H<sub>2</sub>O, and dried at 393 K. SAPO-34 samples were calcined under dry air (Dry Size 300, Airgas) with the same temperature profile stated for SSZ-13 samples.

**Synthesis of pure silica BEA:** Si-BEA was synthesized based on a procedure reported by Cambor et al.<sup>1</sup> Aqueous tetraethylammonium hydroxide (27.169 g, 35 wt% in H<sub>2</sub>O, Sigma-Aldrich) and tetraethyl orthosilicate (24.160 g, 99%, Sigma Aldrich) were added to a Teflon [polytetrafluoroethylene (PTFE)] dish and stirred at 250 rpm at room temperature for 90 min. Deionized H<sub>2</sub>O (15 mL) was added and the solution was left uncovered on the stir plate for 12 h to reach a total mass of 33.046 g after evaporation of ethanol and some of the H<sub>2</sub>O. Next, hydrofluoric acid (2.627 g, 48wt% in H<sub>2</sub>O, > 99.99% trace metals basis, Sigma-Aldrich) was added drop wise and mixed using a PTFE spatula, resulting in a thick gel. Additional H<sub>2</sub>O was added to aid homogenization and the sol-gel was allowed to evaporate to 33.848 g. The final molar composition was 1 SiO<sub>2</sub>:0.56 TEOH:0.56 HF:7.5 H<sub>2</sub>O. The gel was transferred to a 45 mL PTFE-lined stainless steel autoclave and heated to 413 K for 7-20 days under static

conditions. The product was separated from the mother liquor by filtration, washed with distilled H<sub>2</sub>O, and dried at 373 K. The zeolite was calcined under dry air (Dry Size 300, Airgas) with the same temperature profile stated for SSZ-13 samples.

**Synthesis of pure silica MFI:** Si-MFI was synthesized based on a procedure reported by Persson et.al.<sup>2</sup> Aqueous tetrapropylammonium hydroxide (12.00 g, 1.0 M in H<sub>2</sub>O, Sigma-Aldrich) and tetraethyl orthosilicate (5.00 g, 99%, Sigma Aldrich) were added to a Teflon [polytetrafluoroethylene (PTFE)] dish and stirred at 300 rpm at room temperature for 60 min. The molar composition was 1 SiO<sub>2</sub>:0.5 TPAOH:22 H<sub>2</sub>O. The gel was transferred to a 23 mL PTFE-lined stainless steel autoclave and heated to 453 K for 2 days under static conditions. The product was separated from the mother liquor by centrifugation, washed with distilled H<sub>2</sub>O, and dried at 373 K. The zeolite was calcined under dry air (Dry Size 300, Airgas) with the same temperature profile stated for SSZ-13 samples.

### Ion Exchange

**Sodium exchange.** The following procedure was used to ion-exchange all zeolites: 1 g of zeolite was stirred in 36 mL of 2.44 M sodium acetate (> 99%, Sigma-Aldrich) at 353 K for 4 h. Zeolites were subsequently filtered while hot and rinsed with 120 mL of deionized H<sub>2</sub>O. Zeolites were then dried for 4 h at 393 K in a drying oven. The above procedure was repeated three times.

**Copper exchange.** The following procedure was used to ion-exchange all zeolites: 1 g of zeolite was stirred in 60 mL of 0.001 - 0.05 M solutions of copper (II) acetate monohydrate (> 99%, Sigma-Aldrich) at room temperature overnight. The suspension was then filtered at room temperature and rinsed with 300 mL of deionized H<sub>2</sub>O. The zeolite was dried overnight at 393 K in a drying oven and subsequently calcined under dry air (Dry Size 300, Airgas) at 823 K for 5 h with a heating ramp of 1 K min<sup>-1</sup>.

### Incipient Wetness Impregnation

**CuO<sub>x</sub>-BEA.** 0.23 g of a 0.23 M solution of copper (II) nitrate trihydrate (> 99%, Sigma-Aldrich) was added dropwise to 0.30 g of Si-BEA under vigorous stirring, yielding 1.1 wt% of CuO<sub>x</sub> on the BEA zeolite. CuO<sub>x</sub>-BEA was dried overnight at 383 K and then calcined at 853 K for 10 h under flowing dry air (Dry Size 300, Airgas) with a heating ramp of 1 K min<sup>-1</sup>. The resultant zeolite had a gray color.

**CuO<sub>x</sub>-MFI.** 0.239 g of a 0.241 M solution of copper (II) nitrate was added dropwise to 0.352 g of Si-MFI under vigorous stirring, yielding 1.1 wt% of CuO<sub>x</sub> on the MFI zeolite. CuO<sub>x</sub>-MFI was dried overnight and calcined in the same way as stated for CuO<sub>x</sub>-BEA. The resultant zeolite had a gray color.

### Characterization

**Elemental analysis.** Copper (Cu), sodium (Na), aluminum (Al), and iron (Fe) contents were determined using inductively coupled plasma mass spectrometry (ICP-MS) (Agilent 7900). 2.0 –

10.0 mg of zeolite were placed in a polyethylene microfuge tube (1.5 mL) and digested in 0.1 mL hydrofluoric acid (48 wt %, trace metals basis, Sigma-Aldrich) for 3 h. The hydrofluoric acid solution was diluted to a total mass of 10.0 g using 2 wt % aqueous nitric acid (HNO<sub>3</sub>) (veritas purity, GFS Chemicals). 0.10 g of this solution was then added to two solutions: 1) 0.10 g of 1 part per million (ppm) erbium in 2 wt% HNO<sub>3</sub> solution; 2) 9.80 g of 2 wt% HNO<sub>3</sub>. The final concentration of each element was 10 parts per billion (ppb) erbium and between 10 to 300 ppb for Cu, Na, Al, and Fe. A five point calibration curve was built using the following ICP standard solutions: 1,000 ppm Cu in 2 wt% HNO<sub>3</sub>, 1,000 ppm Al in 2 wt% HNO<sub>3</sub>, 1,000 ppm Na in 2 wt% HNO<sub>3</sub>, and 1,000 ppm Fe in 2 wt% HNO<sub>3</sub>. All standard solutions were purchased from Sigma-Aldrich (TraceCERT).

**Calculations of molar ratios Si/Al<sub>tot</sub> and Cu/Al<sub>tot</sub>.** The unit cell of a zeolite is given by:

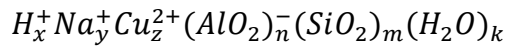

where subscripts refer to the molar ratios of each component within the unit cell of a zeolite. Local charge balance was assumed to occur within the zeolite, requiring  $x = n - 2z - y$ .

From the unit cell given above, the mass balance of the unit cell is given by the following equation on a per gram zeolite basis:

$$1 = a \frac{g SiO_2}{g zeolite} + b \frac{g [AlO_2]^-}{g zeolite} + c \frac{g Cu^{2+}}{g zeolite} + d \frac{g Na^+}{g zeolite} + e \frac{g H^+}{g zeolite} + f \frac{g H_2O}{g zeolite}$$

where each coefficient represents the weight percent of each species. The weight percent of Al, Cu, and Na were directly calculated using ICP-MS, allowing  $b$ ,  $c$ , and  $d$  to be determined. Converting the weight percentages of Al, Cu, and Na to mole percentages per gram zeolite,  $e$  was then calculated using the local charge balance of cations on the zeolite framework. The weight percentage of H<sub>2</sub>O ( $f$ ) was assumed to be equal to the weight percentage of H<sub>2</sub>O in the zeolite framework unit cell (2 – 7 wt %).<sup>3</sup> The mass balance was then solved for the weight percentage of SiO<sub>2</sub> ( $a$ ).

$$Si/Al_{tot} \text{ was calculated by } \frac{Si}{Al_{tot}} = \frac{a m_{AlO_2}}{b m_{SiO_2}} \times \frac{1 mol Si}{1 mol SiO_2} \times \frac{1 mol AlO_2}{1 mol Al}$$

where  $m_i$  is the molar mass of element  $i$ .

$$Cu/Al_{tot} \text{ was calculated by } \frac{Cu}{Al_{tot}} = \frac{c m_{AlO_2}}{b m_{Cu}} \times \frac{1 mol AlO_2}{1 mol Al}$$

**Powder x-ray diffraction.** The crystal structures of zeolite catalysts were determined from powder x-ray diffraction patterns collected using a Bruker D8 diffractometer using Cu-K $\alpha$  radiation ( $\lambda = 1.5418 \text{ \AA}$ , 40 kV, 40 mA). Data were recorded in the range of 3-50  $2\theta$  with an angular step size of 0.02° and a counting time of 0.068 s per step.

**Surface area and pore volume quantification.** Nitrogen adsorption and desorption isotherms were measured on a Quantachrome Autosorb iQ apparatus at liquid nitrogen

temperature (77 K). Prior to the adsorption analysis, all samples were pelletized and degassed under vacuum for 12 h at 623 K. Micropore volume and total pore volume were determined from the amount of N<sub>2</sub> adsorbed at  $P/P_0 = 0.01$  and  $P/P_0 = 0.95$ , respectively.

**Transmission Electron Microscopy (TEM).** Transmission electron microscopy was performed on a JEOL 2010F equipped with a field emission gun (FEG) operating at 200 kV. Magnifications of obtained images ranged from 50,000x to 100,000x.

**Coupled in-situ UV-Vis-NIR Spectroscopy and Online Gas Chromatography.** UV-Vis spectroscopy was performed on a Cary 5000 UV-Vis-NIR spectrometer (Agilent Technologies) equipped with a DiffusIR diffuse reflectance accessory (PIKE Technologies) and environmental chamber (HTV, PIKE Technologies) with a quartz window. Absolute reflectance was measured from 11,000 cm<sup>-1</sup> to 52,600 cm<sup>-1</sup> with a scan rate of 11,700 cm<sup>-1</sup> min<sup>-1</sup>. All spectra were normalized with respect to background spectra of hydrated Na-ZSM-5. The gas outlet from the environmental temperature chamber was connected to a gas chromatograph (Agilent Technologies, model 6890N) equipped with an S-bond column (Restek Rt-S-bond, 30 m, 0.25 mm ID, #19770) and flame ionization detector. The oven temperature was isothermal at 373 K for 10 min.

To conduct in-situ CH<sub>4</sub> oxidation reactions, the temperature was controlled using a PIKE PC Controlled Temperature Module. Cu-ZSM-5 (Cu/Al = 0.37) was ground into a fine powder before loading 10.0 mg into the sample cell. The flow of gases, including He (ultra high purity, Airgas), O<sub>2</sub> (ultra high purity, Airgas), 1% O<sub>2</sub>/He (ultra high purity, Airgas), and CH<sub>4</sub> (research grade, Airgas) were controlled with independent mass flow controllers (Brooks Instruments LLC). H<sub>2</sub>O (typically 3.2 kPa) was introduced into the gas stream using a saturator maintained at 298 K.

### Catalytic CH<sub>4</sub> Oxidation Reactions

CH<sub>4</sub> oxidation reactions were conducted in a continuous, tubular flow reactor (stainless steel tube, O.D. 12.5 mm, wall thickness = 0.889 mm). The reactor tube was mounted inside of a single-zone furnace (850W / 115V, Applied Test Systems Series 3210). Temperature was controlled using a thermocouple (Omega, model TJ36-CASS-18U) mounted slightly downstream of the catalyst bed connected to a temperature controller (Digi-Sense model 68900-10). 2.0 g of zeolite particles (pelletized and sieved into 500–1000 μm particles) were packed between quartz wool plugs and rested on the thermocouple in the middle of the furnace heating zone. The flow of gases, including He (ultra high purity, Airgas), O<sub>2</sub> (ultra high purity, Airgas), 1% O<sub>2</sub> in N<sub>2</sub> (ultra high purity, Airgas), and CH<sub>4</sub> (research grade, Airgas) were controlled with independent mass flow controllers (Brooks Instruments LLC). H<sub>2</sub>O (typically 3.2 kPa) was introduced into the gas stream using saturator maintained at 298 K. O<sub>2</sub> partial pressure entering the catalyst bed was monitored with an O<sub>2</sub> sensor (3000-G-115BTP, Omega Instruments) placed at the entrance of the furnace. Prior to reaction, the zeolite was usually calcined in situ under 50 mL min<sup>-1</sup> flowing O<sub>2</sub> for 5 h at 823 K and cooled under flowing O<sub>2</sub> to reaction temperature (473–498 K). Details for different pretreatment protocols are explicitly stated in the Figure captions. Upon reaching reaction temperature, the zeolite was purged under 50 mL min<sup>-1</sup> of He for 0.5 h. The gas flow was then changed to 80 mL min<sup>-1</sup> CH<sub>4</sub> for 0.5 h followed by 80 mL min<sup>-1</sup> of CH<sub>4</sub>, H<sub>2</sub>O, and O<sub>2</sub> (typically 98.1 kPa, 3.2 kPa, and 0.0025 kPa respectively). CH<sub>3</sub>OH partial pressures

evolved during catalytic CH<sub>4</sub> oxidation were quantified using a gas chromatograph (Agilent Technologies, model 6890N) equipped with an S-bond column (Restek Rt-S-bond, 30 m, 0.25 mm ID, #19770) and flame ionization detector. The oven temperature was isothermal at 373 K for 30 min.

Simulated high conversion CH<sub>4</sub> oxidation experiments were performed in the same reactor described above. Catalyst activation was the same as described above. Liquid reactants CH<sub>3</sub>OH and H<sub>2</sub>O were introduced into the gas stream via saturators maintained at 273 K and 298 K respectively. The reaction mixture of 0.70 kPa CH<sub>3</sub>OH, 2.25 kPa H<sub>2</sub>O, and variable O<sub>2</sub> partial pressure was attained by combining two gas streams at the inlet of the reactor: 1) 15 mL min<sup>-1</sup> He directed through CH<sub>3</sub>OH contained in a saturator, and 2) 65 mL min<sup>-1</sup> total of 1% O<sub>2</sub> in He and/or He gas streams directed through H<sub>2</sub>O contained in a saturator. CH<sub>3</sub>OH, dimethyl ether, CO<sub>2</sub>, and H<sub>2</sub>O were monitored using a gas chromatograph (Agilent Technologies, model 6890N) equipped with thermal conductivity detector and a Carboxen 1006 PLOT column (Sigma-Aldrich, 30 m, 0.32 mm ID, #24241-U). The oven temperature profile was initially 313 K for 2 min, then ramped 10 K min<sup>-1</sup> to 393 K, and then isothermal for 15 min.

**Product quantification.** Calibration curves for CH<sub>3</sub>OH were constructed using a known vapor pressure of CH<sub>3</sub>OH taken into a CH<sub>4</sub> stream. CH<sub>3</sub>OH vapor pressure was controlled by immersing the saturator containing CH<sub>3</sub>OH into cooling baths at several temperatures (e.g. ice water at 273 K, dry ice in ethanol at 201 K, etc). Relative response factors were calculated using the gas chromatograph between known CH<sub>4</sub> and CH<sub>3</sub>OH partial pressures. Calibration curves for CO<sub>2</sub> were constructed by flowing known mixtures of 1% CO<sub>2</sub>/helium and helium to a gas chromatograph-mass spectrometer.

The following definitions were used to quantify experimental data:

The large partial pressure of CH<sub>4</sub> in the gas stream during catalytic CH<sub>4</sub> oxidation reactions prevented the accurate quantification of CH<sub>4</sub> consumption. As such, CH<sub>4</sub> conversion was assumed to be equal to the total molar flow rate of carbon of all observed products divided by the initial molar flow rate of CH<sub>4</sub>:

$$X_{CH_4} = \frac{\sum_{i=1}^N C_i F_i}{F_{CH_4,0}}$$

where  $X_{CH_4}$  is the conversion of CH<sub>4</sub>,  $F_i$  is the molar flow rate of product  $i$ ,  $C_i$  is the number of carbon atoms in product  $i$ ,  $\sum C_i F_i$  is the total molar flow rate of carbon of all products, and  $F_{CH_4,0}$  is the initial molar flow rate of CH<sub>4</sub>.

As explained above, the amount of CH<sub>4</sub> consumed was not quantifiable. Thus, product selectivity for catalytic CH<sub>4</sub> oxidation was defined as:

$$S_i = \frac{C_i F_i}{\sum_{i=1}^N C_i F_i}$$

where  $S_i$  is the selectivity of product  $i$ ,  $C_i$  is the number of carbon atoms in product  $i$ ,  $F_i$  is the molar flow rate of product  $i$ , and  $\sum C_i F_i$  is the total molar flow rate of carbon of all products.

For CH<sub>3</sub>OH oxidation experiments, CH<sub>3</sub>OH conversion was defined as:

$$X_{CH_3OH} = 1 - \frac{F_{CH_3OH}}{F_{CH_3OH,0}}$$

where  $X_{CH_3OH}$  is the conversion of CH<sub>3</sub>OH,  $F_{CH_3OH}$  is the molar flow rate of CH<sub>3</sub>OH at steady state, and  $F_{CH_3OH,0}$  is the initial molar flow rate of CH<sub>3</sub>OH.

Product selectivity was defined as:

$$S_i = \frac{C_i F_i}{F_{CH_3OH,0} - F_{CH_3OH}}$$

where  $S_i$  is the product selectivity,  $C_i$  is the carbon number for product  $i$ ,  $F_i$  is the molar flow rate of product  $i$ , and  $F_{CH_3OH,0} - F_{CH_3OH}$  is the molar flow rate of  $CH_3OH$  reacted at steady state.

Product yield was defined as:

$$Y_i = \frac{C_i F_i}{F_{CH_3OH,0}}$$

where  $Y_i$  was the yield for product  $i$ ,  $F_i$  is the steady state molar flow rate of product  $i$ ,  $C_i$  is the number of carbon atoms in product  $i$ , and  $F_{CH_3OH,0}$  is the initial molar flow rate of  $CH_3OH$ .

***Transient experiments with isotopically labelled molecules.*** The isotopically labeled experiments were performed in the reactor setup described in the introduction to the Catalytic  $CH_4$  oxidation reactions subsection.  $^{13}C$ -methoxy species were deposited on the zeolite surface by exposing a freshly activated zeolite to  $50 \text{ mL min}^{-1}$  of 17%  $^{13}CH_4/He$  (using  $^{13}CH_4$  [99 atom %  $^{13}C$ , Sigma Aldrich]) for 0.5 h.  $^{13}C$ -methoxy species were extracted with a mixture of  $^{12}CH_4/H_2O/O_2$  (98.1/3.2/0.0025 kPa).  $^{13}CH_4$  pulses were introduced by flowing a 3.2 kPa  $H_2O$ , 0.0025 kPa  $O_2$ , and balance  $^{13}CH_4$  gas mixture at a flow rate of  $10 \text{ mL min}^{-1}$  for 0.5 h before resuming a flow of 3.2 kPa  $H_2O$ , 0.0025 kPa  $O_2$ , and  $^{12}CH_4$  balance.  $CH_3OH$  and  $CO_2$  isotopes were analyzed using a gas chromatograph (Agilent Technologies, model 7890N) equipped with a quadrupole mass spectrometer and an S-bond column (Restek Rt-S-bond, 30 m, 0.25 mm ID, #19770). The oven temperature profile was isothermal at 373 K for 30 min.  $^{13}CO_2$  was tracked with  $m/z = 45$ .  $^{13}CH_3OH$  was monitored using  $m/z = 33$  instead of 32 because of small  $O_2$  leaks into the gas chromatograph-mass spectrometer.  $O_2$  leaks elevated the  $m/z = 32$  signal and prevented the detection of trace  $^{13}CH_3OH$  signals relative to background  $O_2$ . However,  $m/z = 33$  did not interfere with  $O_2$ .

### Section S1: Product Identification for CH<sub>4</sub> Oxidation over Cu-Na-ZSM-5 (Cu/Al = 0.37)

Cu-Na-ZSM-5 was activated under oxygen (O<sub>2</sub>) for 5 h at 823 K, cooled to reaction temperature at 483 K under flowing O<sub>2</sub>, and then purged under helium (He) for 1 h. After reaction with methane (CH<sub>4</sub>) for 0.5 h, an extraction gas of 3.2 kPa of water (H<sub>2</sub>O), 0.0025 kPa O<sub>2</sub> and CH<sub>4</sub> balance was flowed over the Cu-Na-ZSM-5 bed. A steady state methanol (CH<sub>3</sub>OH) rate of 0.88 μmol h<sup>-1</sup> g<sub>cat</sub><sup>-1</sup> was achieved after 10 h on-stream (Figure 1). A condenser was placed in-line downstream from the catalyst bed. Next, the gas stream containing CH<sub>4</sub>/H<sub>2</sub>O/O<sub>2</sub> and the oxidation products was passed through the condenser maintained at 201 K in a dry ice-ethanol bath. After 6 h on-stream, the frozen products were thawed in D<sub>2</sub>O, removed from the in-line condenser, and injected into a quartz nuclear magnetic resonance (NMR) tube (528-PP-7, Wilmad LabGlass) for analysis. <sup>1</sup>H-NMR performed on the condensate in a 500 MHz spectrometer (Varian Inova-500) showed CH<sub>3</sub>OH as the only product (Figure S1). Gas phase products of the reactor effluent were analyzed using a gas chromatograph equipped with a quadrupole mass spectrometer (Agilent 7890N). The only gas phase product from the reaction was carbon dioxide (CO<sub>2</sub>). Assuming CO<sub>2</sub> and CH<sub>3</sub>OH were the only reaction products, the steady state CH<sub>4</sub> conversion was 0.0014% and the CH<sub>3</sub>OH selectivity was 70.6% (Figure S2).

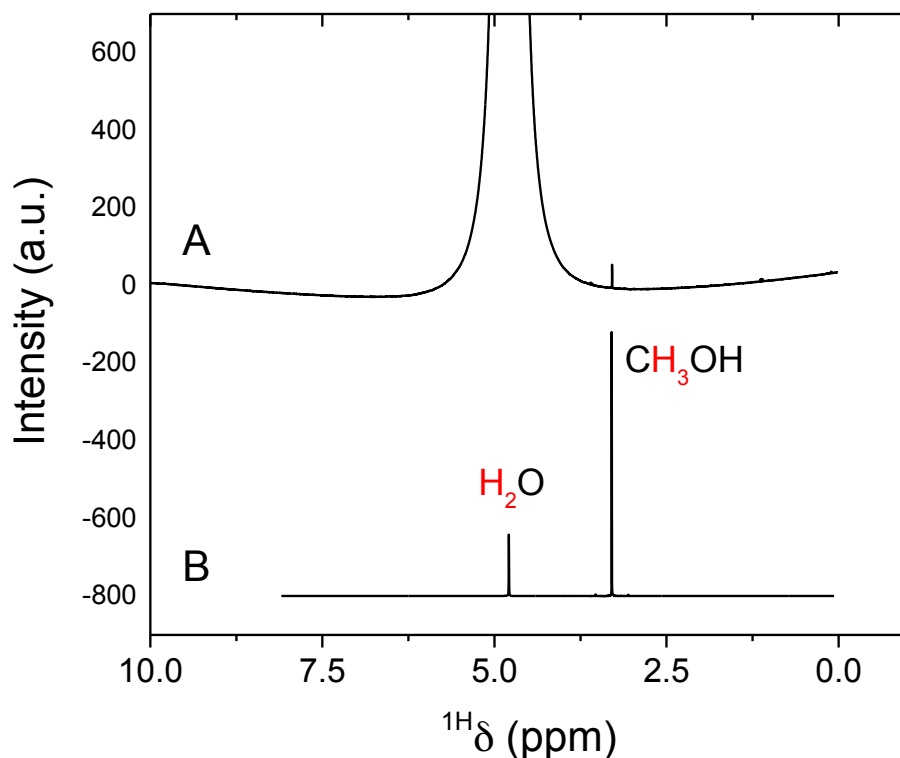

**Figure S1. <sup>1</sup>H-NMR spectrum of liquid oxygenated products from CH<sub>4</sub> oxidation over Cu-Na-ZSM-5 (Cu/Al = 0.37) collected in a dry ice/ethanol cold trap.**

(A) <sup>1</sup>H-NMR of liquid products from steady state CH<sub>4</sub> oxidation over Cu-Na-ZSM-5 (Cu/Al = 0.37, Na/Al = 0.26) condensed in a condenser immersed in a dry ice-ethanol bath after 6 h on-stream. (B) <sup>1</sup>H-NMR of a CH<sub>3</sub>OH standard in D<sub>2</sub>O.



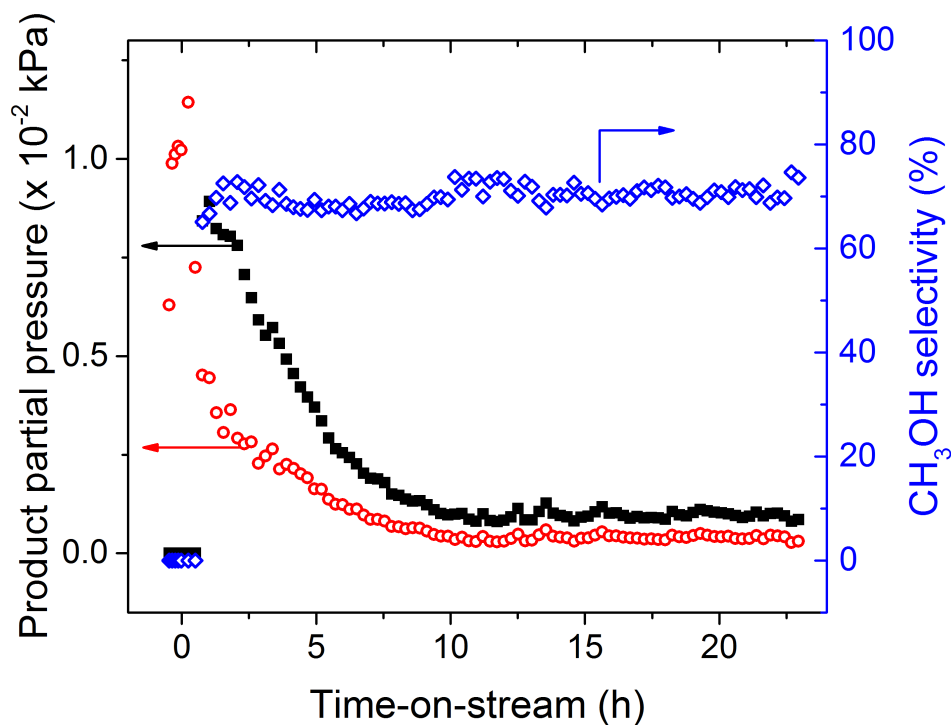

**Figure S2. Selectivity and product partial pressures for CH<sub>4</sub> oxidation over Cu-Na-ZSM-5 (Cu/Al = 0.37, Na/Al = 0.26).**

Catalyst pretreatment: 5 h at 823 K under flowing O<sub>2</sub>, cooled to 483 K under O<sub>2</sub> flow and then purged under He for 0.5 h. Initial CH<sub>4</sub> oxidation: 0.5 h under 2400 mL h<sup>-1</sup> g<sub>cat</sub><sup>-1</sup> of CH<sub>4</sub> at 483 K. Reaction conditions: T = 483 K, WHSV = 2400 mL h<sup>-1</sup> g<sub>cat</sub><sup>-1</sup>, P<sub>CH<sub>4</sub></sub> = 98.1 kPa, P<sub>H<sub>2</sub>O</sub> = 3.2 kPa, P<sub>O<sub>2</sub></sub> = 0.0025 kPa (25 ppm). (▪) CH<sub>3</sub>OH partial pressure (kPa). (○) CO<sub>2</sub> partial pressure (kPa). (◇) CH<sub>3</sub>OH selectivity

## Section S2: Simulation of High Conversion CH<sub>4</sub> Oxidation via CH<sub>3</sub>OH Oxidation over Cu-Na-ZSM-5 (Cu/Al = 0.37)

The over-oxidation of CH<sub>3</sub>OH into CO<sub>2</sub> at higher CH<sub>4</sub> conversion levels was simulated by introducing CH<sub>3</sub>OH as a reactant. The direct oxidation of CH<sub>4</sub> into CH<sub>3</sub>OH over copper-exchanged ZSM-5 under regular conditions generated a conversion of 0.0014 %. At these conditions, the low O<sub>2</sub> partial pressure (0.0025 kPa) was sufficient to convert CH<sub>4</sub> into CH<sub>3</sub>OH (4.5 × 10<sup>-4</sup> kPa O<sub>2</sub> is needed to produce CH<sub>3</sub>OH at a rate of 0.88 μmol h<sup>-1</sup> g<sub>cat</sub><sup>-1</sup>), but it was observed that the excess O<sub>2</sub> further oxidized CH<sub>3</sub>OH into CO<sub>2</sub> at 483 K (30% selectivity to CO<sub>2</sub>). Therefore, since higher conversion of CH<sub>4</sub> (e.g. 1%) will require more O<sub>2</sub> in the reaction mixture, the excess O<sub>2</sub> at this scale could also over-oxidize CH<sub>3</sub>OH into CO<sub>2</sub> decreasing the overall selectivity of the process.

To evaluate CO<sub>2</sub> selectivity at higher CH<sub>4</sub> conversions, CH<sub>3</sub>OH was used as a reactant to simulate the gas composition the Cu-Na-ZSM-5 (Cu/Al = 0.37) catalyst bed would encounter at 100% CH<sub>4</sub> conversion. After activating Cu-Na-ZSM-5 for 5 h at 823 K under O<sub>2</sub>, the zeolite bed was cooled to 483 K and purged under He for 1 h. Then a reaction mixture of 0.70 kPa CH<sub>3</sub>OH, variable O<sub>2</sub> partial pressure, 2.25 kPa H<sub>2</sub>O and He was passed over the catalyst bed. Flowing this reaction mixture over Cu-Na-ZSM-5 and measuring the extent of CO<sub>2</sub> production can be used as a surrogate to calculate the maximum CO<sub>2</sub> selectivity. A 0.70 kPa partial pressure of CH<sub>3</sub>OH simulated a CH<sub>4</sub> partial pressure of 0.70 kPa being fully converted into CH<sub>3</sub>OH. The O<sub>2</sub> partial pressure was varied to represent unreacted or excess O<sub>2</sub> from a typical CH<sub>4</sub> oxidation experiment. Helium (He) was used instead of CH<sub>4</sub> in the gas mixture to isolate CH<sub>3</sub>OH oxidation and exclude the coadsorption of CH<sub>4</sub> on the zeolite surface. The gas mixture composed of 0.70 kPa CH<sub>3</sub>OH, 2.25 kPa H<sub>2</sub>O, and O<sub>2</sub> was flowed over the Cu-Na-ZSM-5 catalyst for 5 h at 483 K before the steady state gas composition was analyzed in order to allow for changes in copper speciation that occur in regular CH<sub>4</sub> oxidation experiments (Figure 3 – S11). As the O<sub>2</sub> partial pressure was increased from 0.21 kPa to 2.70 kPa, the CO<sub>2</sub> yield increased from 6.8% to 24% (Figure S3A). The rate order of O<sub>2</sub> in CH<sub>3</sub>OH oxidation was ca. 0.50 (Figure S3B). As expected, lower amounts of O<sub>2</sub> relative to CH<sub>3</sub>OH (lower O<sub>2</sub>/CH<sub>3</sub>OH partial pressure ratio) suppress the formation of CO<sub>2</sub>. However, even having up to 4 times the partial pressure of O<sub>2</sub> as CH<sub>3</sub>OH only generated a 24% yield and 25% selectivity of CO<sub>2</sub>, which was a lower CO<sub>2</sub> selectivity than that observed during regular CH<sub>4</sub> oxidation experiments over Cu-Na-ZSM-5 at similar conditions (Figure S2, P<sub>O2</sub>/P<sub>CH3OH</sub> = 2.5). Therefore, these results suggest that CH<sub>4</sub> oxidation to higher conversions will not result in a substantial increase in CO<sub>2</sub> production or a decrease in CH<sub>3</sub>OH selectivity at 483 K.

CO<sub>2</sub> selectivity could be further reduced by lowering the temperature of the simulated gas mixture over Cu-Na-ZSM-5. As the reaction temperature was lowered to 463 K, the CO<sub>2</sub> yield and selectivity decreased from 24% to 7.4% (Figure S4). These data show that CH<sub>3</sub>OH selectivity could increase beyond 70% by lowering the reaction temperature (< 483 K) in a high conversion CH<sub>4</sub> oxidation process.

CH<sub>3</sub>OH conversion was greater than 90% for the simulated, high conversion CH<sub>4</sub> oxidation experiments (Figure S3A) where the vast majority of CH<sub>3</sub>OH was converted into dimethyl ether (DME) (> 60% yield). DME is produced from the acid-catalyzed dehydration of CH<sub>3</sub>OH.<sup>4</sup> Brønsted acid sites in zeolites are well known to perform this reaction between 473 and 573 K.<sup>5,6</sup> However, zeolites can still produce DME even with trace Brønsted acidity,<sup>7</sup> such as that present in sodium-exchanged ZSM-5.<sup>8</sup> CH<sub>3</sub>OH dehydration is thermodynamically favorable under the CH<sub>3</sub>OH oxidation reaction conditions of 483 K, 0.70 kPa CH<sub>3</sub>OH, and 2.25 kPa H<sub>2</sub>O. The

reaction  $2 \text{CH}_3\text{OH} \leftrightarrow (\text{CH}_3)_2\text{O} + \text{H}_2\text{O}$  has a chemical equilibrium constant ( $K_{\text{eq}}$ ) of 14.8 under these reaction conditions, and the equilibrium conversion of  $\text{CH}_3\text{OH}$  to DME would be 92%.

In the simulated, high conversion  $\text{CH}_4$  oxidation experiments, the DME yield decreased from 80% to 62% as the  $\text{O}_2$  partial pressure increased from 0.21 kPa to 2.7 kPa (Figure S3A), consistent with  $\text{CH}_3\text{OH}$  or DME being oxidized into  $\text{CO}_2$ . At a lower temperature of 463 K, the DME yield increased from 62% to 74% (Figure S4).

DME was not observed in typical  $\text{CH}_4$  oxidation experiments over Cu-Na-ZSM-5 due to the low equilibrium conversion of  $\text{CH}_3\text{OH}$  into DME. At steady state, taking the  $\text{CH}_3\text{OH}$  partial pressure to be  $10^{-3}$  kPa and the  $\text{H}_2\text{O}$  partial pressure to be 3.2 kPa, the equilibrium conversion of  $\text{CH}_3\text{OH}$  into DME at 483 K would be 0.90%. The theoretical maximum amount of DME that could be produced was below the detection limit of the gas chromatograph used to quantify steady state rates.

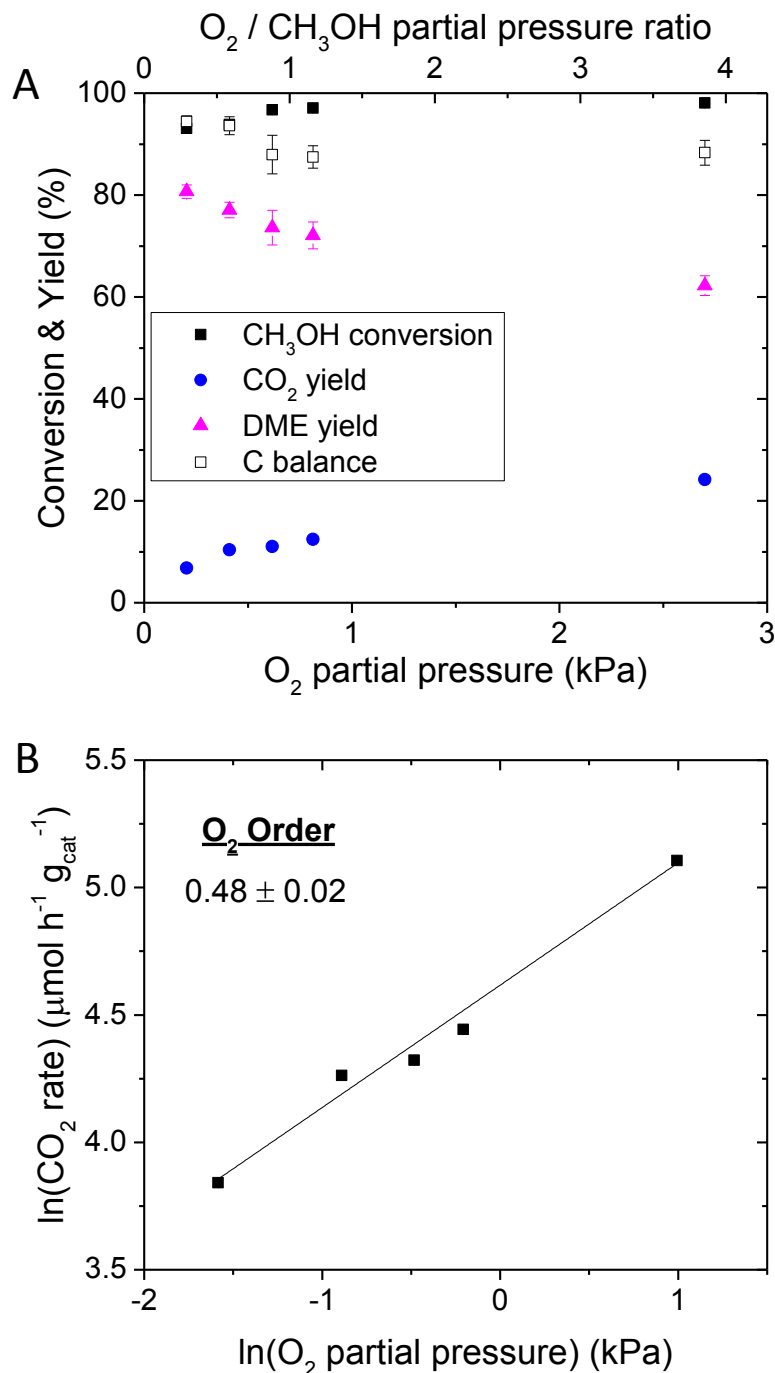

**Figure S3. Simulation of high conversion CH<sub>3</sub>OH oxidation over Cu-Na-ZSM-5 versus O<sub>2</sub> partial pressure.**

(A) CH<sub>3</sub>OH oxidation as a function of O<sub>2</sub> partial pressure and (B) order of O<sub>2</sub> for CH<sub>3</sub>OH oxidation over Cu-Na-ZSM-5 (Cu/Al = 0.37, Na/Al = 0.26). (A) Pretreatment: 5 h at 823 K under O<sub>2</sub>, cooled under O<sub>2</sub> flow to 483 K and then purged 0.5 h under He. Reaction conditions: T = 483 K, WHSV = 2400 mL h<sup>-1</sup> g<sub>cat</sub><sup>-1</sup>, P<sub>CH<sub>3</sub>OH</sub> = 0.70 kPa, P<sub>H<sub>2</sub>O</sub> = 2.25 kPa, He balance. (B) Same conditions as (A). Error bars and ± denote 95% confidence intervals.

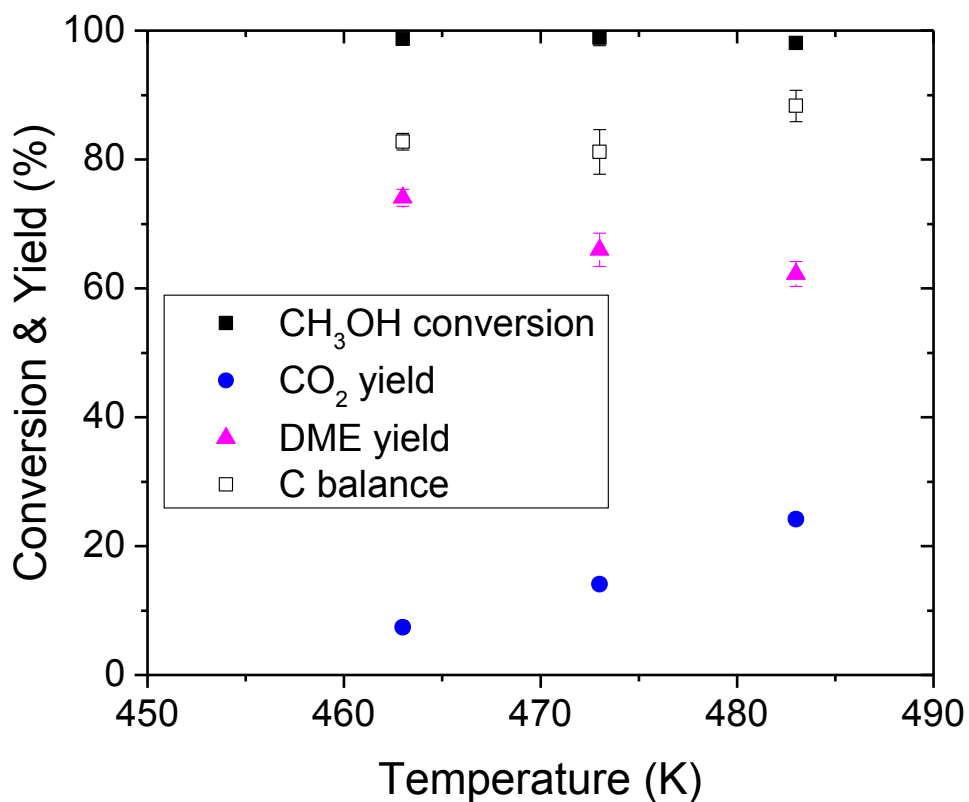

**Figure S4. Simulation of high conversion CH<sub>4</sub> oxidation over Cu-Na-ZSM-5 versus reaction temperature.**

Pretreatment: 5 h at 823 K under O<sub>2</sub>, cooled under O<sub>2</sub> flow to 483 K and purged 0.5 h under He  
 Reaction conditions: WHSV = 2400 mL h<sup>-1</sup> g<sub>cat</sub><sup>-1</sup>, P<sub>CH<sub>3</sub>OH</sub> = 0.70 kPa, P<sub>H<sub>2</sub>O</sub> = 2.25 kPa, P<sub>O<sub>2</sub></sub> = 2.70 kPa, He balance. Error bars denote 95% confidence intervals.

Section S3: Steady-state CH<sub>3</sub>OH Production over Cu-H-ZSM-5 (Cu/Al = 0.31)

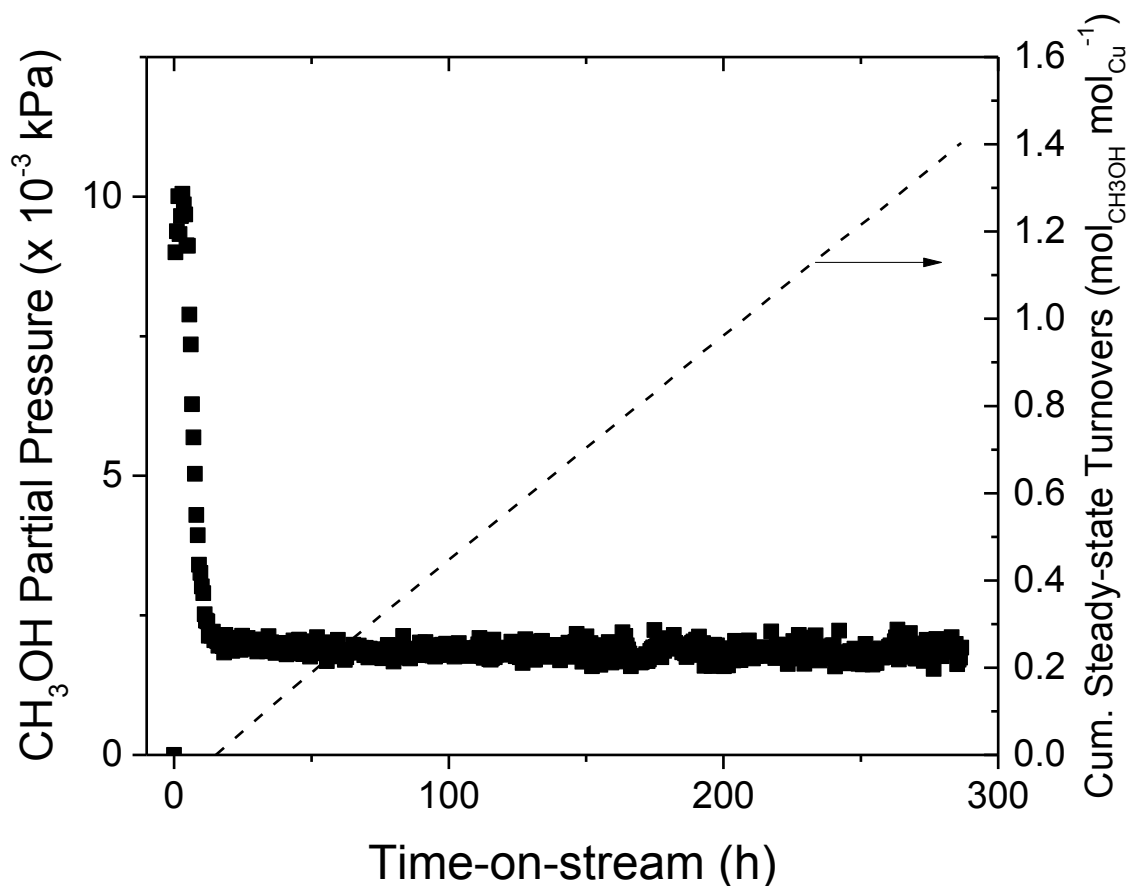

**Figure S5. CH<sub>4</sub> oxidation over Cu-H-ZSM-5 (Cu/Al = 0.31).**

Catalyst pretreatment: 5 h at 823 K under flowing O<sub>2</sub>, cooled to 483 K under O<sub>2</sub> flow and then purged under He for 0.5 h. Initial CH<sub>4</sub> oxidation: 0.5 h under 2400 mL h<sup>-1</sup> g<sub>cat</sub><sup>-1</sup> of CH<sub>4</sub> at 483 K. Reaction conditions: T = 483 K, WHSV = 2400 mL h<sup>-1</sup> g<sub>cat</sub><sup>-1</sup>, P<sub>CH<sub>4</sub></sub> = 98.1 kPa, P<sub>H<sub>2</sub>O</sub> = 3.2 kPa, P<sub>O<sub>2</sub></sub> = 0.0025 kPa (25 ppm). Dashed line denotes cumulative turnovers collected at steady-state.

Section S4:  $^{13}\text{C}$  Isotopically Labelled Control Experiments over Cu-Na-ZSM-5 (Cu/Al = 0.37)

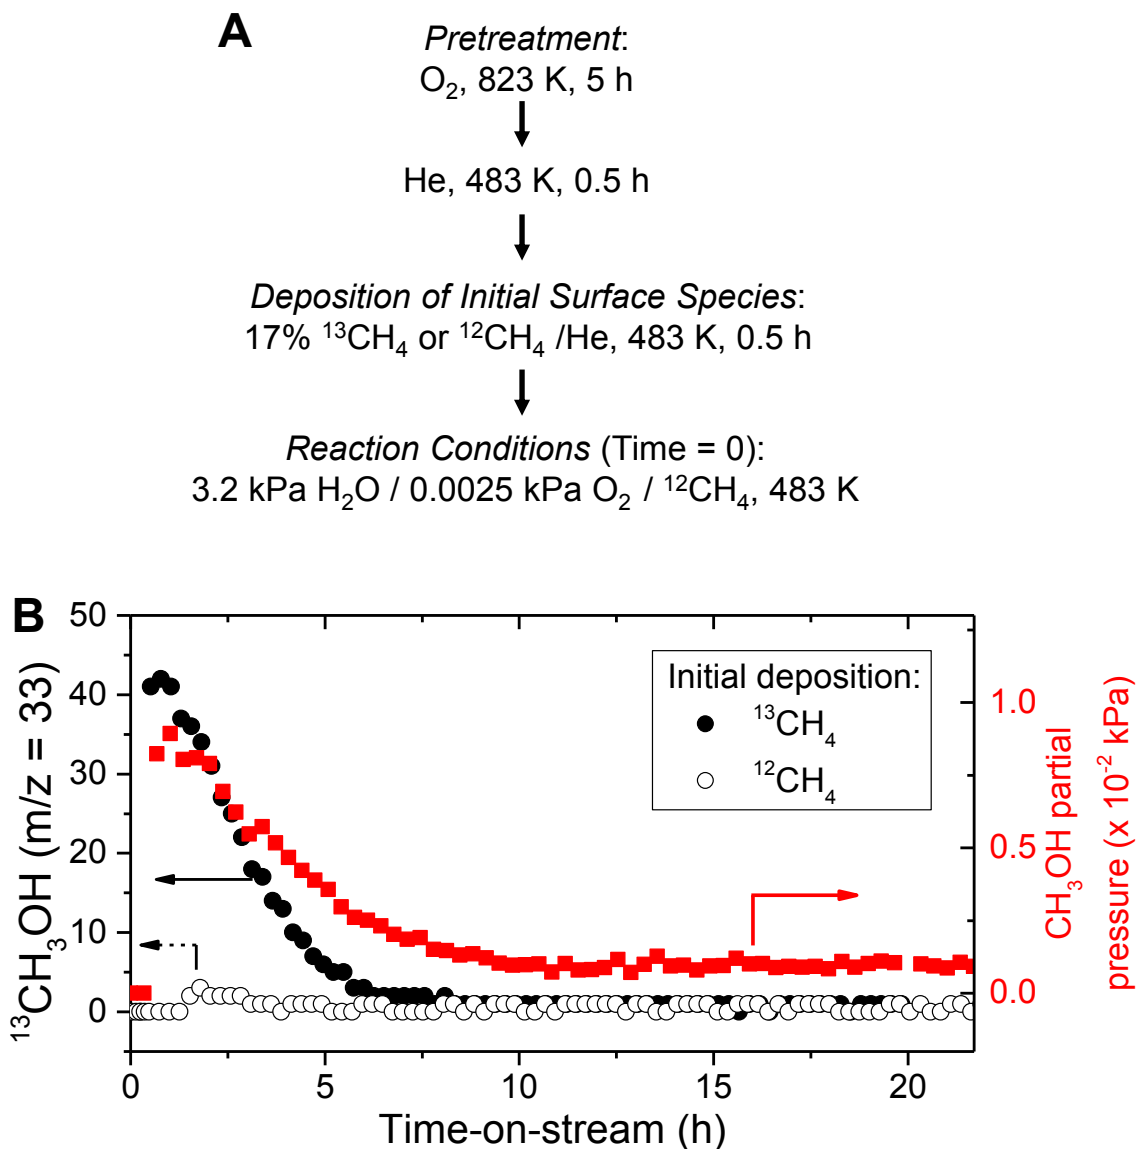

**Figure S6. Isotopically labeled kinetic experiments over Cu-Na-ZSM-5 (Cu/Al = 0.37, Na/Al = 0.26).**

(A) Experimental pretreatment protocols used for the initial deposition of surface species on Cu-Na-ZSM-5 with  $^{13}\text{CH}_4$  or  $^{12}\text{CH}_4$ . (B) Extraction of  $\text{CH}_3\text{OH}$  from the Cu-Na-ZSM-5 surface initially deposited by  $^{13}\text{CH}_4$  (●) or  $^{12}\text{CH}_4$  (○). Reaction conditions:  $T = 483\text{ K}$ ,  $\text{WHSV} = 2400\text{ mL h}^{-1}\text{ g}_{\text{cat}}^{-1}$ ,  $P_{^{12}\text{CH}_4} = 98.1\text{ kPa}$ ,  $P_{\text{H}_2\text{O}} = 3.2\text{ kPa}$ ,  $P_{\text{O}_2} = 0.0025\text{ kPa}$  (25 ppm).

### Section S5: $^{13}\text{CO}_2$ Production during Transient, Isotopically Labeled Experiments over Cu-Na-ZSM-5 (Cu/Al = 0.37)

$^{13}\text{C}$  methoxy species were deposited on the zeolite by flowing  $^{13}\text{CH}_4$  (16.8 kPa  $^{13}\text{CH}_4$  [99 atom%  $^{13}\text{C}$ , Sigma-Aldrich] with balance He) over activated Cu-Na-ZSM-5 for 0.5 h at 483 K and then using a regular  $^{12}\text{CH}_4/\text{H}_2\text{O}/\text{O}_2$  gas mixture to evolve oxidation products from the zeolite. As shown in Figure S7A, enriched  $^{13}\text{CO}_2$  ( $m/z = 45$ ) is quickly produced in the stoichiometric regime, but unlabeled  $^{12}\text{CO}_2$  is observed in the steady state regime, thus suggesting unlabeled  $^{12}\text{C}$  surface species are oxidized into  $^{12}\text{CO}_2$  once the  $^{13}\text{C}$  species are depleted. The reaction rate remained at steady state (rate =  $0.88 \mu\text{mol}_{\text{CH}_3\text{OH}} \text{h}^{-1} \text{g}_{\text{cat}}^{-1}$ ) for 21 h at a weight hourly space velocity (WHSV) of  $2400 \text{ mL h}^{-1} \text{g}_{\text{cat}}^{-1}$  (equivalent to the production of  $18.5 \mu\text{mol g}_{\text{cat}}^{-1}$  of  $^{12}\text{CH}_3\text{OH}$ ). Next, the gas mixture was switched to  $^{13}\text{CH}_4/\text{H}_2\text{O}/\text{O}_2$  for 0.5 h at a WHSV =  $300 \text{ mL h}^{-1} \text{g}_{\text{cat}}^{-1}$  before resuming the flow of the regular, unlabeled mixture. This  $^{13}\text{CH}_4$  pulse resulted in the production of  $^{13}\text{CO}_2$  during steady state  $\text{CH}_3\text{OH}$  production as evidenced by the pulse of  $m/z = 45$  signal in Figure S7A. Control experiments using  $^{12}\text{CH}_4$  to populate the activated catalyst with unlabeled  $^{12}\text{C}$  methoxy species did not generate a significant amount of  $^{13}\text{CO}_2$  in the stoichiometric or steady state regimes (Figure S7C).

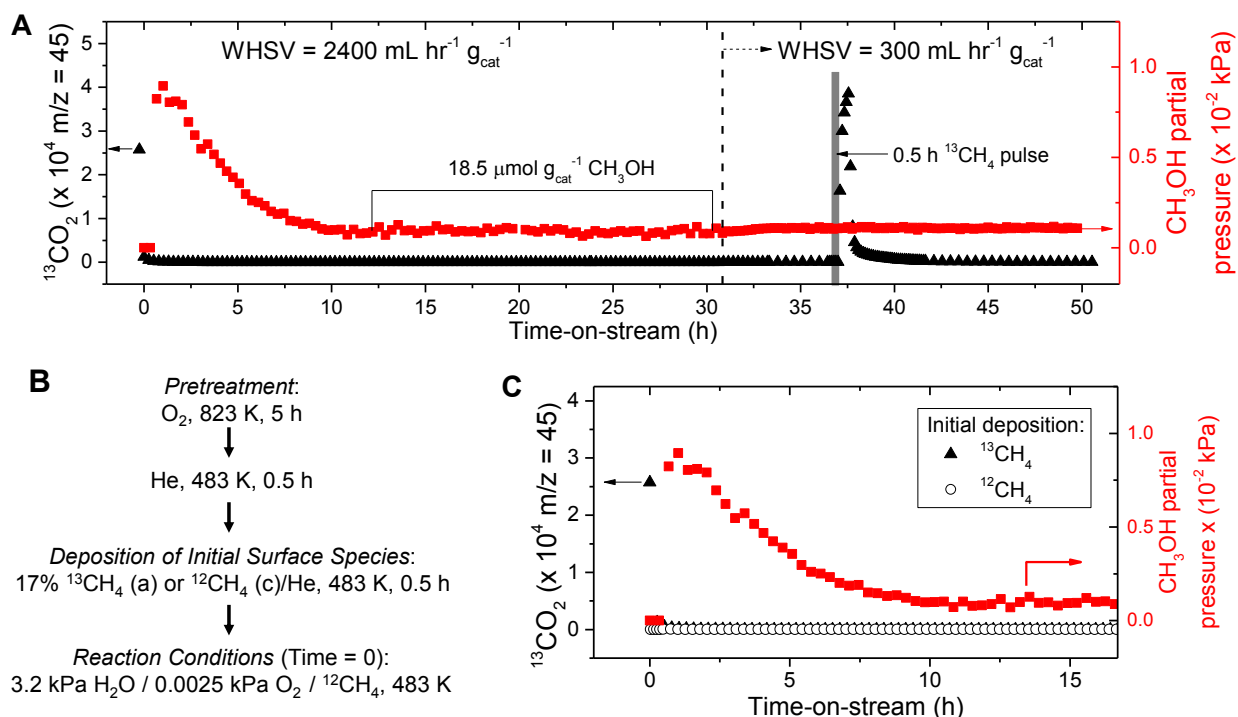

**Figure S7. Transient, isotopically labeled kinetic experiments over Cu-Na-ZSM-5 (Cu/Al = 0.37, Na/Al = 0.26).**

(A)  $^{13}\text{CO}_2$  production from initial deposition of  $^{13}\text{CH}_4$  on Cu-Na-ZSM-5 surface and transient, pulsed  $^{13}\text{CH}_4$ . (B) Experimental pretreatments for panels (A) and (C). (C) Comparison of  $^{13}\text{CO}_2$  production using  $^{13}\text{CH}_4$  or  $^{12}\text{CH}_4$  after activation of Cu-Na-ZSM-5.

(A) Reaction conditions:  $T = 483 \text{ K}$ ,  $\text{WHSV} = 2400 \text{ mL h}^{-1} \text{g}_{\text{cat}}^{-1}$ ,  $P_{^{12}\text{CH}_4} = 98.1 \text{ kPa}$ ,  $P_{\text{H}_2\text{O}} = 3.2 \text{ kPa}$ ,  $P_{\text{O}_2} = 0.0025 \text{ kPa}$  (25 ppm). After 31 h on-stream, WHSV was reduced to  $300 \text{ mL h}^{-1} \text{g}_{\text{cat}}^{-1}$ . Gray area denotes 0.5 h pulse of  $P_{^{13}\text{CH}_4} = 98 \text{ kPa}$ ,  $P_{\text{H}_2\text{O}} = 3.2 \text{ kPa}$ ,  $P_{\text{O}_2} = 0.0025 \text{ kPa}$ . (▲)  $^{13}\text{CO}_2$  evolution and (■)  $\text{CH}_3\text{OH}$  partial pressure (kPa). (C) Reaction conditions:  $T = 483 \text{ K}$ ,  $\text{WHSV} =$



2400 mL h<sup>-1</sup> g<sub>cat</sub><sup>-1</sup>, P<sub>12CH<sub>4</sub></sub> = 98.1 kPa, P<sub>H<sub>2</sub>O</sub> = 3.2 kPa, P<sub>O<sub>2</sub></sub> = 0.0025 kPa. Initial deposition of surface species used either 17% <sup>13</sup>CH<sub>4</sub> (▲) or <sup>12</sup>CH<sub>4</sub> (○) in He at 483 K.

### Section S6: Isotopically Labelled Experiments over Cu-H-ZSM-5 (Cu/Al = 0.31)

Catalytic turnover was also verified over Cu-H-ZSM-5 (Cu/Al = 0.31) using similar experimental procedures as outlined in Figure S6A. When an activated Cu-H-ZSM-5 was reacted with  $^{13}\text{CH}_4$  before extraction (Figure S8A), a large pulse of  $^{13}\text{CH}_3\text{OH}$  was observed in the stoichiometric regime. However, as  $\text{CH}_3\text{OH}$  production approached steady state,  $^{13}\text{CH}_3\text{OH}$  production declined and resulted in the production of exclusively  $^{12}\text{CH}_3\text{OH}$  (Figure S8B). However, virtually no  $^{13}\text{CH}_3\text{OH}$  was extracted from the zeolite when  $^{12}\text{CH}_4$  was used for the initial reaction. These experiments show that the source carbon for  $\text{CH}_3\text{OH}$  produced at steady state must come from gas phase  $^{12}\text{CH}_4$ , thereby indicating turnover on the Cu-H-ZSM-5 surface.

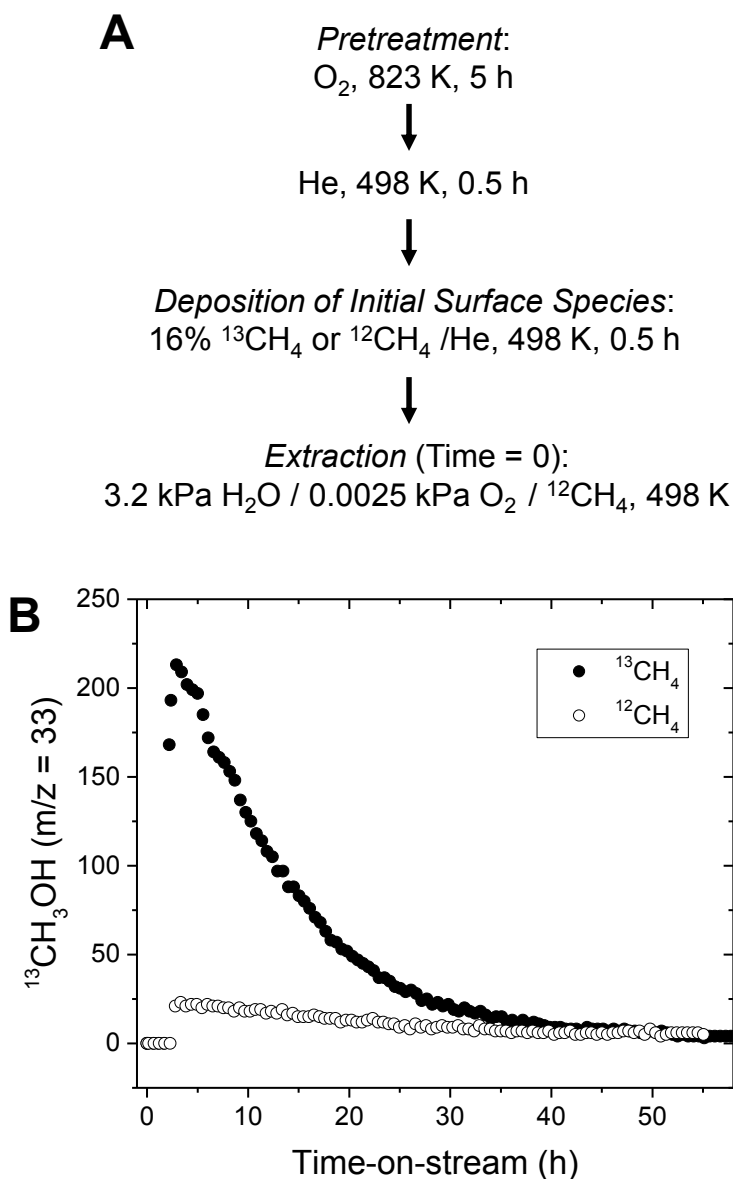

**Figure S8. Isotopically labeled studies over Cu-H-ZSM-5 (Cu/Al = 0.31).**

(A) Experimental pretreatments for panel (B). (B) Extraction of  $^{13}\text{CH}_3\text{OH}$  from Cu-H-ZSM-5 surface initially deposited by  $^{13}\text{CH}_4$  (●) or  $^{12}\text{CH}_4$  (○). Reaction conditions:  $T = 498$  K,  $\text{WHSV} = 300 \text{ mL h}^{-1} \text{ g}_{\text{cat}}^{-1}$ ,  $P_{^{12}\text{CH}_4} = 98.1$  kPa,  $P_{\text{H}_2\text{O}} = 3.2$  kPa,  $P_{\text{O}_2} = 0.0025$  kPa (25 ppm).

### **Section S7: Kinetic Order Dependence of Reactants and Transient, Isotopic Pulsing of CD<sub>4</sub> over Cu-Na-ZSM-5 (Cu/Al = 0.37)**

The partial pressure of O<sub>2</sub> was varied over Cu-Na-ZSM-5 (Cu/Al = 0.37, Na/Al = 0.26) to deduce the order of O<sub>2</sub> on catalytic CH<sub>4</sub> oxidation activity. After activating the zeolite under O<sub>2</sub> at 823 K for 5 h, Cu-Na-ZSM-5 was cooled to 483 K under O<sub>2</sub> flow, purged under He, and reacted under dry 75% CH<sub>4</sub>/He at 483 K for 0.5 h. Afterwards, 3.2 kPa H<sub>2</sub>O and O<sub>2</sub> were then introduced into the reactant stream. The O<sub>2</sub> partial pressure was controlled using a 1% O<sub>2</sub>/N<sub>2</sub> gas stream co-fed with He while maintaining CH<sub>4</sub> and H<sub>2</sub>O partial pressures at 72.5 kPa and 3.2 kPa respectively. As the partial pressure of O<sub>2</sub> decreased, the observed catalytic CH<sub>3</sub>OH production rate remained fairly constant, showing the rate was zero order with respect to O<sub>2</sub> (Figure S9A).

The catalytic CH<sub>3</sub>OH production rate demonstrated positive kinetic orders with respect to CH<sub>4</sub> and H<sub>2</sub>O partial pressures. The rate dependence of CH<sub>4</sub> was investigated by varying CH<sub>4</sub> partial pressure from 49 to 98 kPa while maintaining H<sub>2</sub>O and O<sub>2</sub> partial pressures constant at 3.2 kPa and 0.0025 kPa respectively. The catalytic rate of CH<sub>3</sub>OH production exhibited a first order dependence on CH<sub>4</sub> partial pressure (Figure S9B), indicating the dilution of CH<sub>4</sub> in the reaction feed is undesired. Similarly, H<sub>2</sub>O increased the production of CH<sub>3</sub>OH from Cu-Na-ZSM-5. H<sub>2</sub>O vapor pressure was controlled between 1.1 to 3.2 kPa using aqueous CaCl<sub>2</sub> solutions in a saturator maintained at 298 K. The CH<sub>4</sub> and O<sub>2</sub> partial pressures were kept constant at 98 and 0.0025 kPa respectively. CH<sub>3</sub>OH production decreased as the H<sub>2</sub>O partial pressure decreased (Figure S9C) by order of 0.5. As expected, when no H<sub>2</sub>O was delivered to the catalyst, no CH<sub>3</sub>OH was detected, indicating that H<sub>2</sub>O was necessary for CH<sub>3</sub>OH extraction.

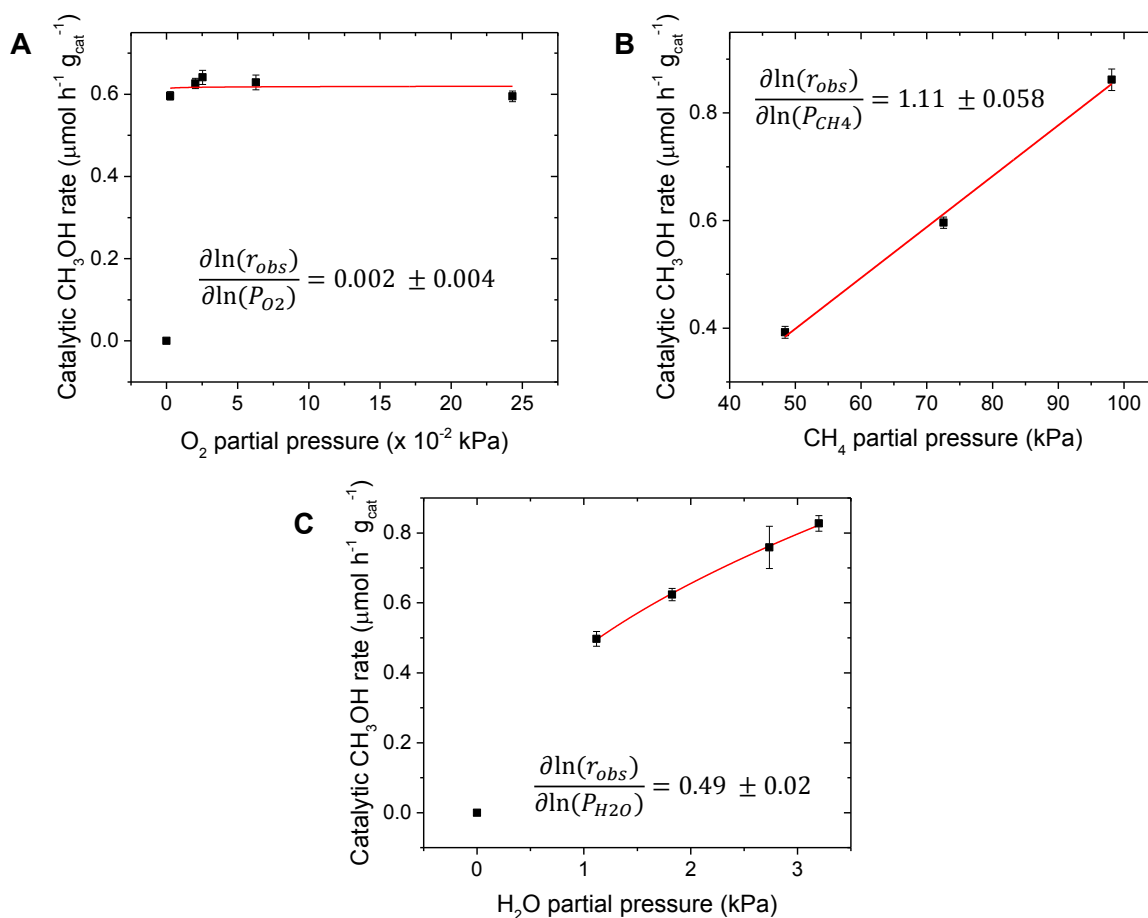

**Figure S9. Kinetic order of reactants for catalytic  $\text{CH}_4$  oxidation over Cu-Na-ZSM-5 (Cu/Al = 0.37)**

The effect of (A)  $\text{O}_2$  partial pressure, (B)  $\text{CH}_4$  partial pressure, and (C)  $\text{H}_2\text{O}$  partial pressure on  $\text{CH}_4$  oxidation over Cu-Na-ZSM-5. Catalyst pretreatment: 5 h at 823 K under flowing  $\text{O}_2$ , cooled to 483 K under  $\text{O}_2$  flow and then purged under He for 0.5 h. Initial  $\text{CH}_4$  oxidation: 0.5 h under  $2400 \text{ mL h}^{-1} \text{g}_{\text{cat}}^{-1} \text{CH}_4$ .

Reaction conditions: (A)  $T = 483 \text{ K}$ ,  $\text{WHSV} = 2400 \text{ mL h}^{-1} \text{g}_{\text{cat}}^{-1}$ ,  $P_{\text{CH}_4} = 72.5 \text{ kPa}$ ,  $P_{\text{H}_2\text{O}} = 3.2 \text{ kPa}$ , He balance. (B)  $T = 483 \text{ K}$ ,  $\text{WHSV} = 2400 \text{ mL h}^{-1} \text{g}_{\text{cat}}^{-1}$ ,  $P_{\text{H}_2\text{O}} = 3.2 \text{ kPa}$ ,  $P_{\text{O}_2} = 0.0025 \text{ kPa}$  (25 ppm),  $P_{\text{He}}$  balance. (C)  $T = 483 \text{ K}$ ,  $\text{WHSV} = 2400 \text{ mL h}^{-1} \text{g}_{\text{cat}}^{-1}$ ,  $P_{\text{CH}_4} = 98.1 \text{ kPa}$ ,  $P_{\text{O}_2} = 0.0025 \text{ kPa}$  (25 ppm),  $P_{\text{H}_2\text{O}}$  controlled via saturator filled with aqueous  $\text{CaCl}_2$  solutions,  $P_{\text{He}} =$  balance. Error bars and  $\pm$  denote 95% confidence intervals.

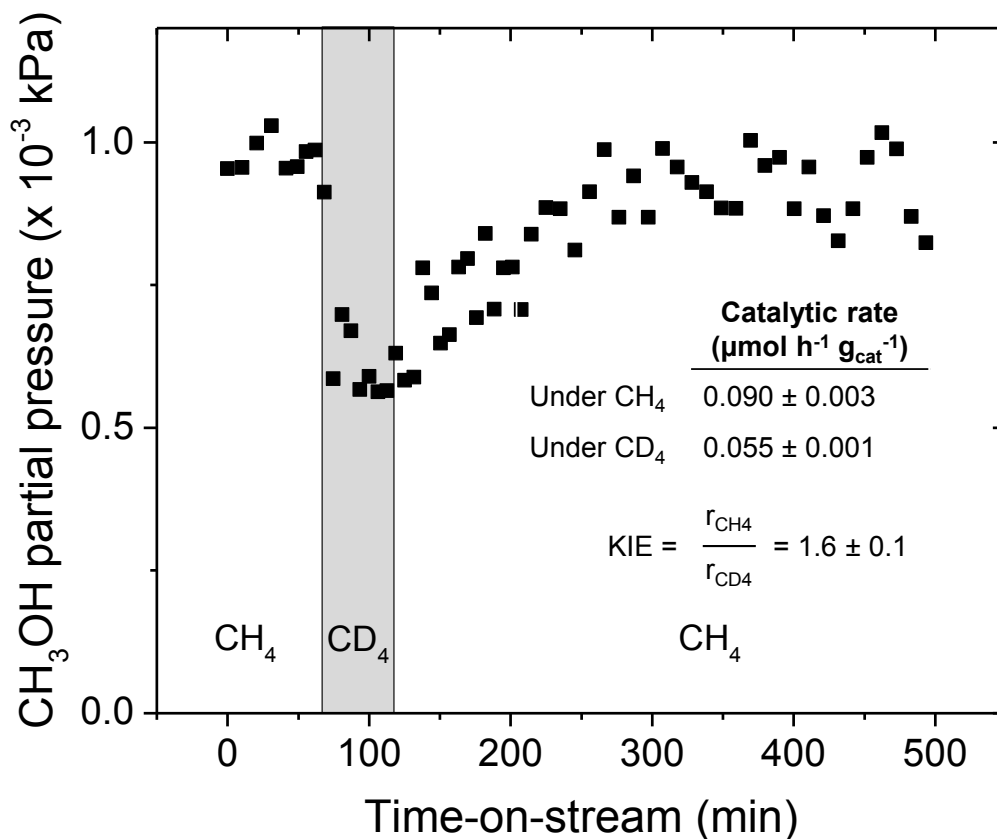

**Figure S10. Transient, isotopically labeled  $\text{CD}_4$  pulse over Cu-Na-ZSM-5 (Cu/Al = 0.37, Na/Al = 0.26).**

Catalyst pretreatment: 5 h at 823 K under flowing  $\text{O}_2$ , cooled to 483 K under  $\text{O}_2$  flow and then purged under He for 0.5 h. Initial  $\text{CH}_4$  oxidation: 0.5 h under  $240 \text{ mL h}^{-1} \text{g}_{\text{cat}}^{-1} \text{CH}_4$ . Reaction conditions:  $T = 483 \text{ K}$ ,  $\text{WHSV} = 240 \text{ mL h}^{-1} \text{g}_{\text{cat}}^{-1}$ ,  $P_{\text{CH}_4} = 98.1 \text{ kPa}$ ,  $P_{\text{H}_2\text{O}} = 3.2 \text{ kPa}$ ,  $P_{\text{O}_2} = 0.0025 \text{ kPa}$  (25 ppm). Gray area denotes 0.75 h pulse of  $\text{CD}_4$ :  $\text{WHSV} = 240 \text{ mL h}^{-1} \text{g}_{\text{cat}}^{-1}$ ,  $P_{\text{CD}_4} = 98.1 \text{ kPa}$ ,  $P_{\text{H}_2\text{O}} = 3.2 \text{ kPa}$ ,  $P_{\text{O}_2} = 0.0025 \text{ kPa}$  (25 ppm). KIE = kinetic isotope effect.  $r_{\text{CH}_4}$  = catalytic  $\text{CH}_3\text{OH}$  production rate under  $\text{CH}_4$ .  $r_{\text{CD}_4}$  = catalytic  $\text{CH}_3\text{OH}$  production rate under  $\text{CD}_4$ .  $\pm$  denotes 95% confidence interval.

**Section S8: Thermal Pretreatments and the Onset of Catalytic Activity over Cu-Na-ZSM-5 (Cu/Al = 0.37)**

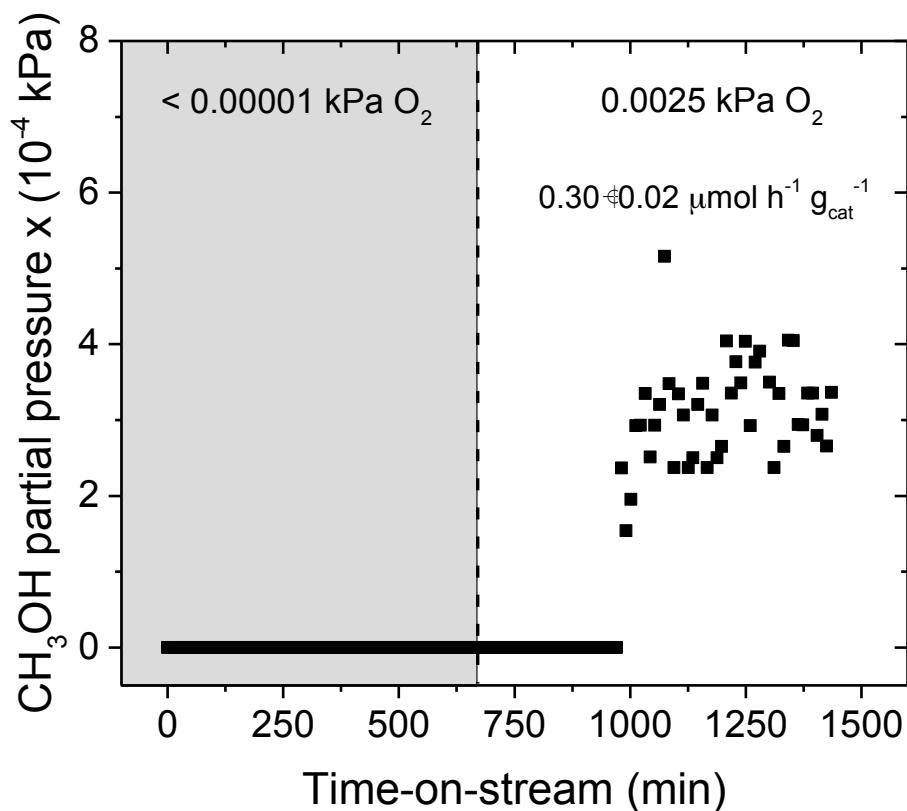

**Figure S11. CH<sub>4</sub> oxidation over Cu-Na-ZSM-5 (Cu/Al = 0.37, Na/Al = 0.26) pretreated under O<sub>2</sub>-free conditions.**

Catalyst pretreatment: 5 h at 823 K under He (< 0.00001 kPa O<sub>2</sub>), cooled to 483 K under He flow. Initial CH<sub>4</sub> oxidation: 0.5 h under 2400 mL h<sup>-1</sup> g<sub>cat</sub><sup>-1</sup> CH<sub>4</sub>. Reaction conditions: T = 483 K, WHSV = 2400 mL h<sup>-1</sup> g<sub>cat</sub><sup>-1</sup>, P<sub>CH<sub>4</sub></sub> = 98.1 kPa, P<sub>H<sub>2</sub>O</sub> = 3.2 kPa. Background colors: Gray: P<sub>O<sub>2</sub></sub> = < 0.00001 kPa (0.1 ppm), White: P<sub>O<sub>2</sub></sub> = 0.0025 kPa (25 ppm). O<sub>2</sub> levels reduced to < 0.00001 kPa using a CuO trap. ± denotes 95% confidence interval.

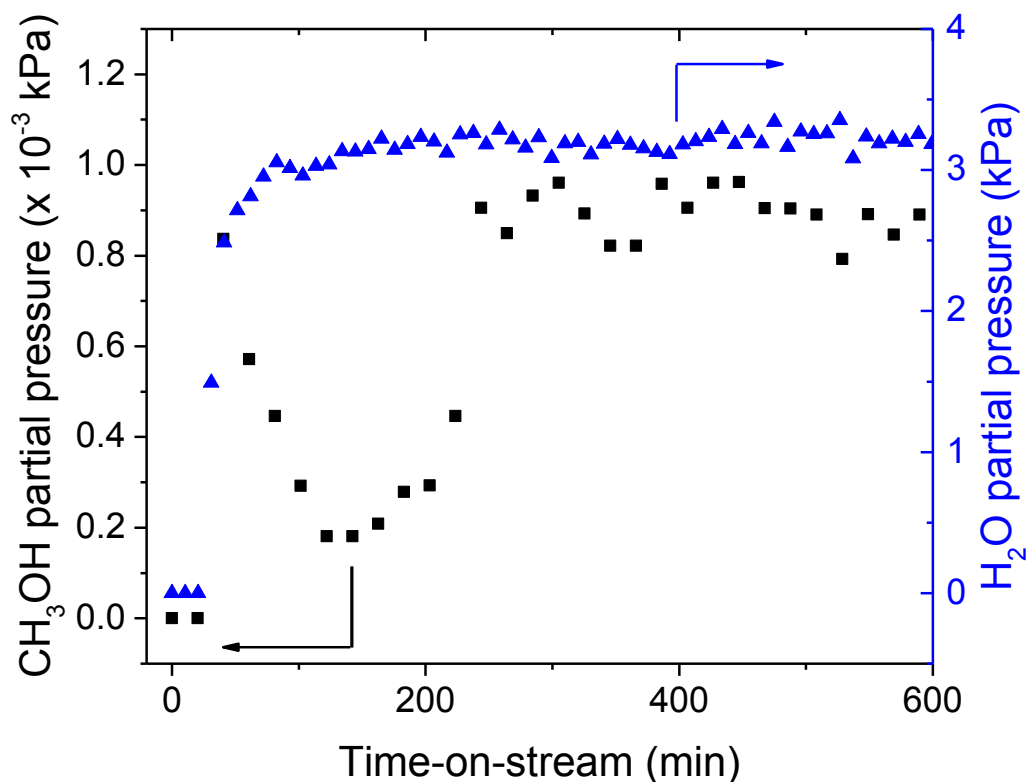

**Figure S12. H<sub>2</sub>O breakthrough over Cu-Na-ZSM-5 (Cu/Al = 0.37, Na/Al = 0.26) during CH<sub>4</sub> oxidation.**

(■) CH<sub>3</sub>OH partial pressure (kPa). (▲) H<sub>2</sub>O partial pressure (kPa). Pretreatment: ramped under O<sub>2</sub>, 5 h at 823 K under He (20 ppm O<sub>2</sub>), cooled to 483 K under He. Initial CH<sub>4</sub> oxidation: 0.5 h under 2400 mL h<sup>-1</sup> g<sub>cat</sub><sup>-1</sup> CH<sub>4</sub>. Reaction conditions: T = 483 K, WHSV = 2400 mL h<sup>-1</sup> g<sub>cat</sub><sup>-1</sup>, P<sub>CH<sub>4</sub></sub> = 98.1 kPa, P<sub>H<sub>2</sub>O</sub> = 3.2 kPa, P<sub>O<sub>2</sub></sub> = 0.0025 kPa (25 ppm)

## Section S9: In-situ Diffuse Reflectance UV-visible Spectroscopy and Online Gas Chromatography Measurements over Cu-Na-ZSM-5 (Cu/Al = 0.37)

UV-visible spectroscopic and online gas chromatographic measurements were performed over Cu-Na-ZSM-5 (Cu/Al=0.37) to gain insight into copper speciation during pretreatments and steady-state operation. The zeolite was heated at 5 K/min under flowing O<sub>2</sub> to 823 K and then calcined under He (20 ppm O<sub>2</sub>) at 823 K for 2 h. A shoulder at 22,700 cm<sup>-1</sup> decayed within 1 h of He treatment (Figure S13), indicating the majority of the mono-(μ-oxo) dicupric cores were eliminated. Cu-Na-ZSM-5 was then cooled to 483 K under He and then exposed to pure CH<sub>4</sub> for 0.5 h. No significant changes in the UV-visible spectra were observed (Figure S14), further suggesting the elimination of most of the mono-(μ-oxo) dicupric cores. After flowing 93.2 kPa CH<sub>4</sub>, 0.051 kPa O<sub>2</sub>, and 3.2 kPa H<sub>2</sub>O at 483 K, a small amount of stoichiometric CH<sub>3</sub>OH was extracted from zeolite before steady-state CH<sub>3</sub>OH production (Figure S15A), consistent with kinetic experiments (Figure 3, red symbols). During stoichiometric CH<sub>3</sub>OH production, there were no changes in the 22,700 cm<sup>-1</sup> region (Figure S15B.1-2). Lastly, no bands were present at 22,700 cm<sup>-1</sup> peak during steady-state CH<sub>3</sub>OH production (Figure S15C.1-2, D.1-2), indicating the mono-(μ-oxo) dicupric cores are likely not present during catalytic operation.



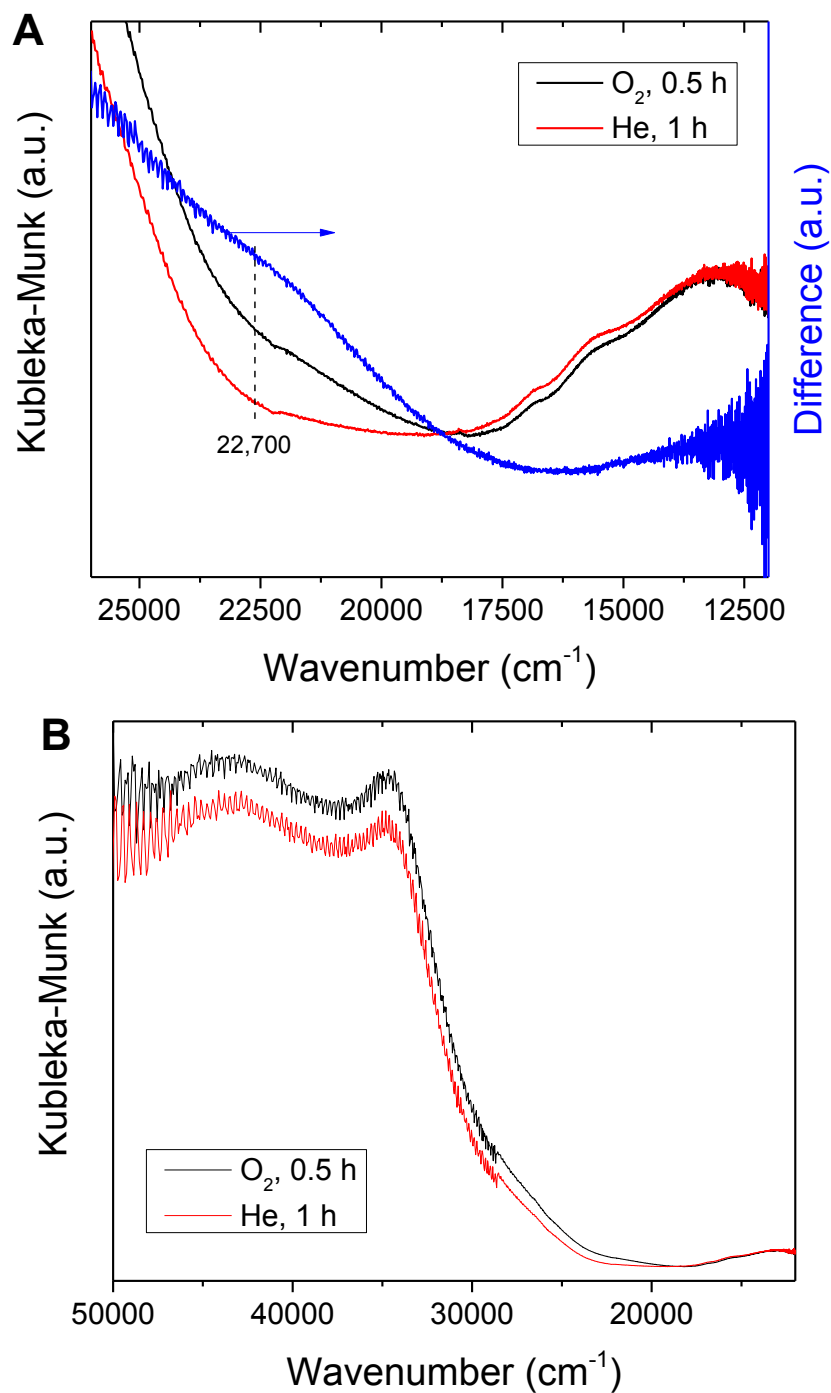

**Figure S13. In-situ diffuse reflectance UV-visible spectra of Cu-Na-ZSM-5 (Cu/Al = 0.37) in the (A) visible region and (B) full region.** Cu-Na-ZSM-5 was heated under flowing  $\text{O}_2$  (5 K/min) to 823 K and held for 0.5 h (black) and then calcined under He (20 ppm  $\text{O}_2$ ) for 2 h (red). Difference spectra (calcined in  $\text{O}_2$ —calcined in He) are shown (blue, right axis). The decay of the  $22,700 \text{ cm}^{-1}$  band after He treatment is highlighted.

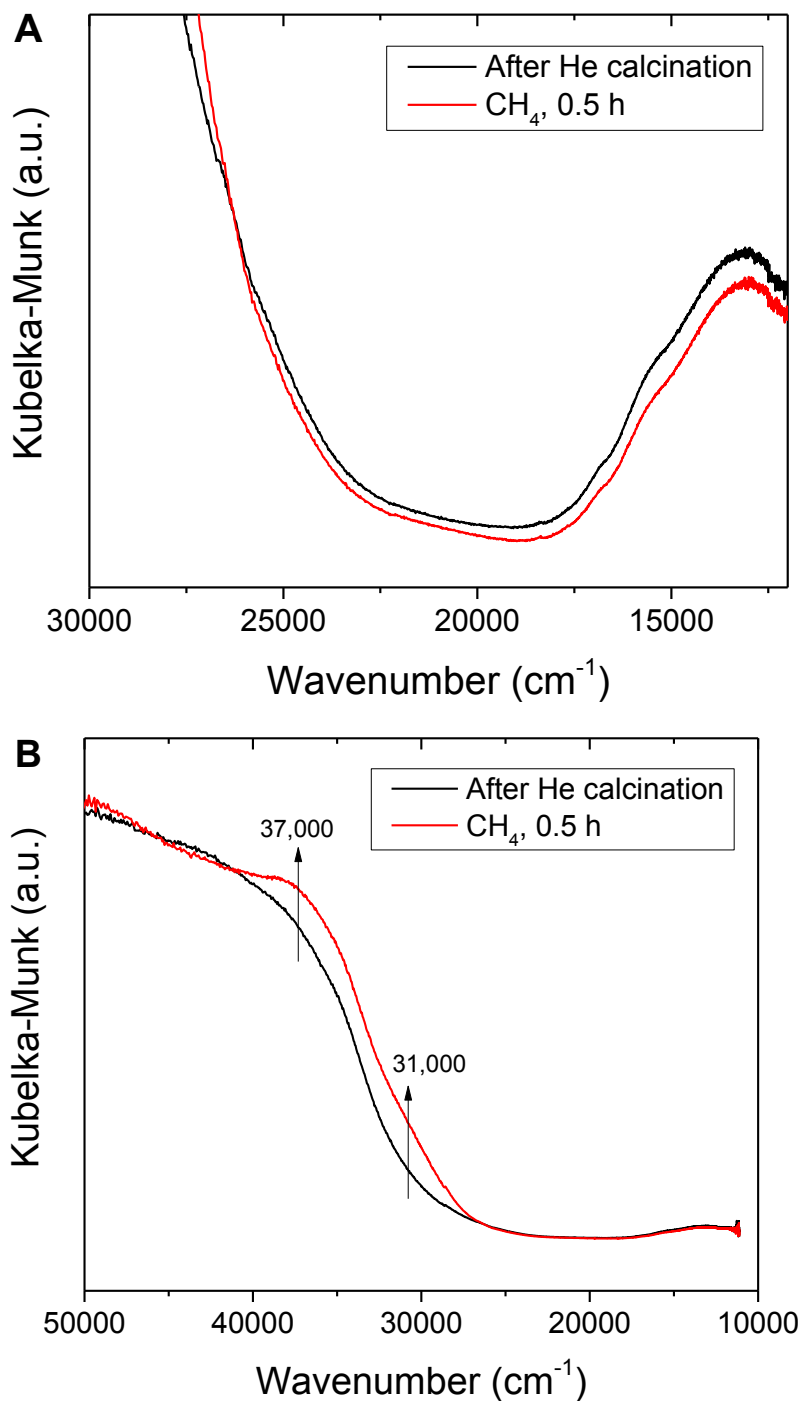

**Figure S14. In-situ diffuse reflectance UV-visible spectra of Cu-Na-ZSM-5 (Cu/Al = 0.37) in the (A) visible region and (B) full spectra** Catalyst pretreatment: heated to 823 K under flowing  $\text{O}_2$ , calcined 2 h at 823 K under He (20 ppm  $\text{O}_2$ ) and cooled to 483 K under He. The zeolite was then exposed to  $\text{CH}_4$  for 0.5 h. No significant differences were observed in the visible region.

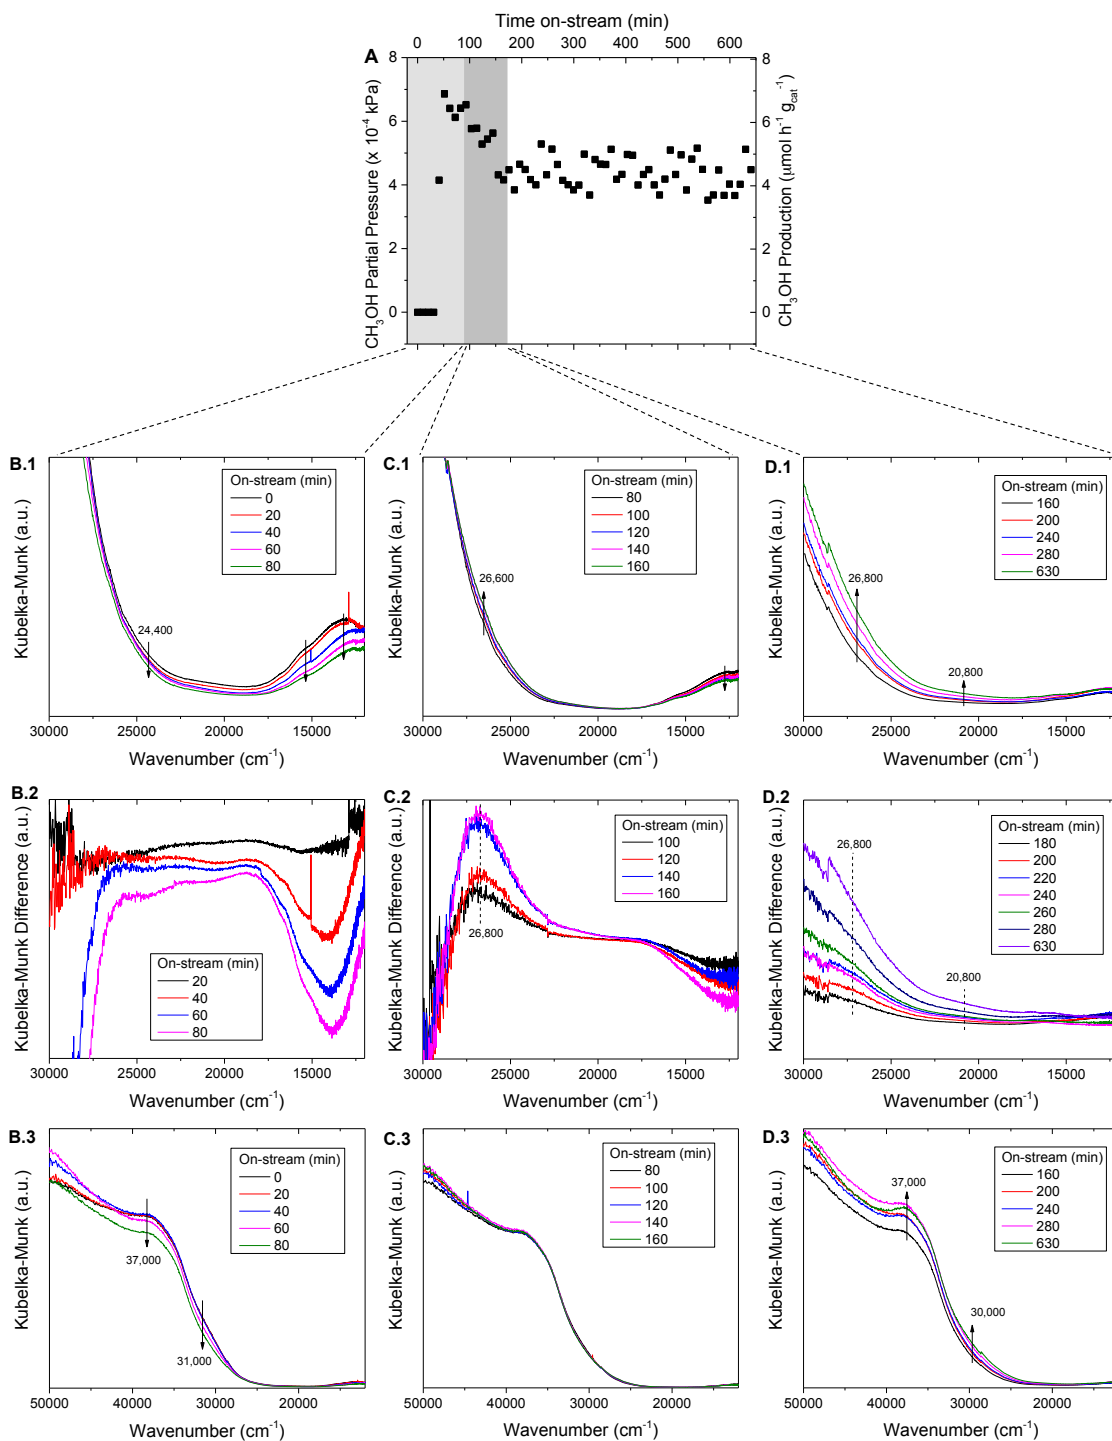

**Figure S15. Combined in-situ diffuse reflectance UV-visible spectroscopy and online gas chromatography measurements for catalytic CH<sub>4</sub> oxidation over Cu-Na-ZSM-5 (Cu/Al = 0.37).** Catalyst pretreatment: heating to 823 K under flowing O<sub>2</sub>, 2 h at 823 K under He, cooled to 483 K under flowing He. Initial CH<sub>4</sub> oxidation: 0.5 h under 25000 mL h<sup>-1</sup> g<sub>cat</sub><sup>-1</sup> of CH<sub>4</sub> at 483 K. Reaction conditions: T = 483 K, WHSV = 25000 mL h<sup>-1</sup> g<sub>cat</sub><sup>-1</sup>, P<sub>CH<sub>4</sub></sub> = 93.2 kPa, P<sub>H<sub>2</sub>O</sub> = 3.2 kPa, P<sub>O<sub>2</sub></sub> = 0.051 kPa. (A) CH<sub>3</sub>OH production from Cu-Na-ZSM-5 measured by gas chromatography. (B.1-B.3) diffuse reflectance UV-vis spectra of the 0-80 min time on-stream interval corresponding to the onset of stoichiometric CH<sub>3</sub>OH production. The difference spectra in (B.2) subtracts the spectrum at 0 min from each spectrum in the 20-80 min time on-stream interval. (C.1-C.3) diffuse reflectance UV-vis spectra of the 80-160 min time on-stream interval corresponding to the end of stoichiometric and the onset of

steady-state  $\text{CH}_3\text{OH}$  production. The difference spectra in (C.2) subtracts the spectrum at 80 min from each spectrum in the 100-160 min time on-stream interval. (D.1-D.3) diffuse reflectance UV-vis spectra of the 160-630 min time on-stream interval corresponding to steady-state  $\text{CH}_3\text{OH}$  production. The difference spectra in (D.2) subtracts the spectrum at 160 min from each spectrum in the 180-630 min time on-stream interval.

## Section S10: Catalytic CH<sub>4</sub> Oxidation over Cu-ZSM-5 and Cu-MOR Zeolites

**Table S1. CH<sub>4</sub> oxidation over Cu-exchanged ZSM-5 and MOR zeolites**

| Material  | Framework | Si/Al <sub>nom</sub> <sup>a</sup> | Co-Cation       | Si/Al <sub>tot</sub> <sup>b</sup> | Cu/Al <sub>tot</sub> <sup>c</sup> | Specific Activity <sup>d</sup> | STY <sup>e</sup><br>(x 10 <sup>-3</sup> h <sup>-1</sup> ) | E <sub>a</sub> <sup>app</sup> <sup>f</sup><br>(kJ/mol) |
|-----------|-----------|-----------------------------------|-----------------|-----------------------------------|-----------------------------------|--------------------------------|-----------------------------------------------------------|--------------------------------------------------------|
| ZSM-5     | MFI       | 11.5                              | Na <sup>+</sup> | 13.1                              | 0.17                              | 0.51                           | 2.7                                                       | 47 ± 2                                                 |
|           |           |                                   |                 | 13.6                              | 0.37                              | 0.88                           | 2.2                                                       | 54 ± 5                                                 |
|           |           |                                   | H <sup>+</sup>  | 13.9                              | 0.13                              | 0.84                           | 6.0                                                       | 88 ± 6                                                 |
|           |           |                                   |                 | 14.1                              | 0.38                              | 1.51                           | 3.8                                                       | 80 ± 2                                                 |
| Mordenite | MOR       | 10                                | Na <sup>+</sup> | 11.4                              | 0.14                              | 0.30                           | 1.8                                                       | 92 ± 3                                                 |
|           |           |                                   | H <sup>+</sup>  | 11.1                              | 0.14                              | 0.84                           | 4.6                                                       | 149 ± 2                                                |

Catalyst pretreatment: 5 h at 823 K under flowing O<sub>2</sub>, cooled to 483 K under O<sub>2</sub> flow and then purged under He for 0.5 h. Initial CH<sub>4</sub> oxidation: 0.5 h under 2400 mL h<sup>-1</sup> g<sub>cat</sub><sup>-1</sup> CH<sub>4</sub>. Reaction conditions: T = 483 K, WHSV = 2400 mL h<sup>-1</sup> g<sub>cat</sub><sup>-1</sup>, P<sub>CH<sub>4</sub></sub> = 98.1 kPa, P<sub>H<sub>2</sub>O</sub> = 3.2 kPa, P<sub>O<sub>2</sub></sub> = 0.0025 kPa (25 ppm). ± denotes 95% confidence intervals

<sup>a</sup> nominal ratio of silicon to aluminum atoms in each zeolite based on commercial figures.

<sup>b</sup> ratio of total silicon to aluminum atoms in each zeolite sample. Determined using inductively coupled plasma mass spectrometry (ICP-MS).

<sup>c</sup> ratio of total copper to aluminum atoms in each zeolite sample. Determined using ICP-MS.

<sup>d</sup> specific activity is defined as μmol<sub>CH<sub>3</sub>OH</sub> h<sup>-1</sup> g<sub>cat</sub><sup>-1</sup>.

<sup>e</sup> Site-time yield (STY) is defined as mol CH<sub>3</sub>OH (mol Cu)<sup>-1</sup> h<sup>-1</sup>.

<sup>f</sup> E<sub>a</sub><sup>app</sup> is defined as apparent activation energy (kJ/mol).

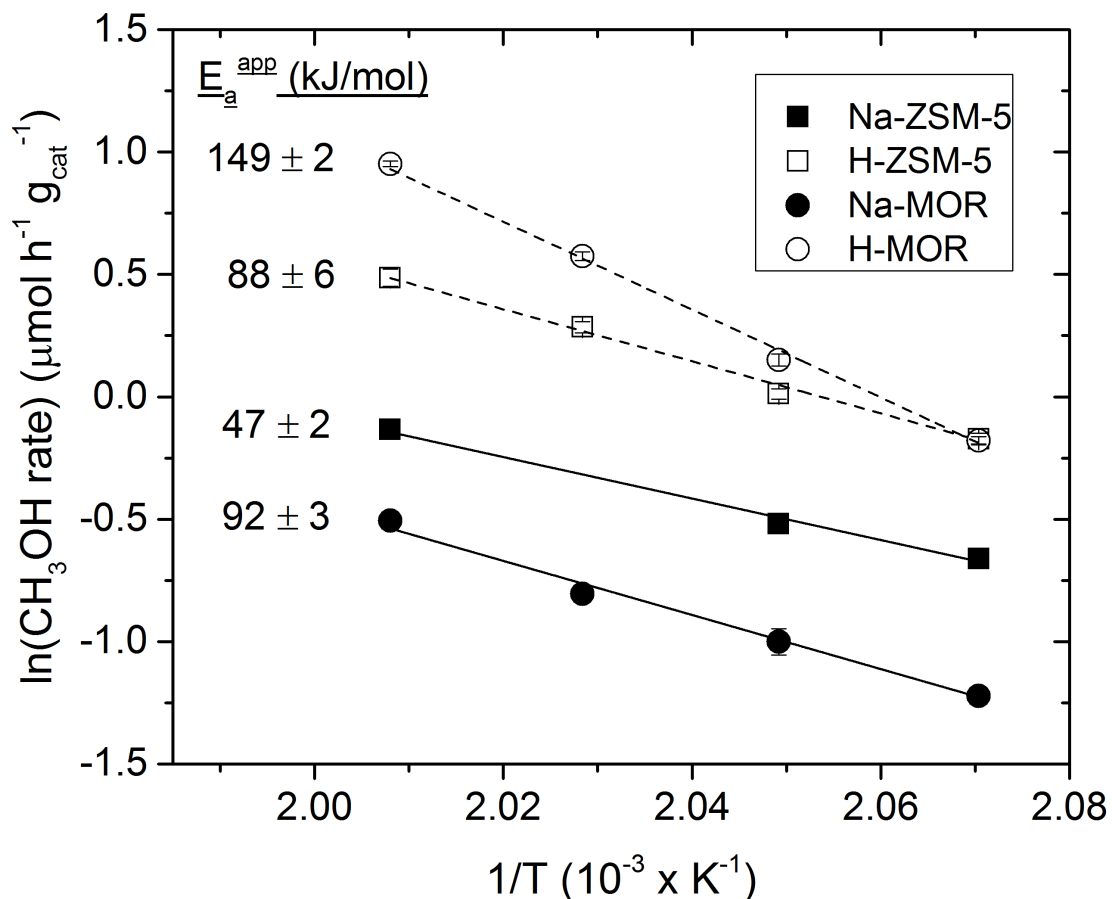

**Figure S16. Arrhenius plot of catalytic  $\text{CH}_4$  oxidation over Cu-ZSM-5 and Cu-MOR zeolites.**

Open symbols: zeolites with Brønsted acid sites (ZSM-5 had Cu/Al = 0.13, MOR had Cu/Al = 0.14). Closed symbols: zeolites with sodium as counter ions (ZSM-5 had Cu/Al = 0.17, MOR had Cu/Al = 0.14). Catalyst pretreatment: 5 h at 823 K under flowing  $\text{O}_2$ , cooled to 483 K under  $\text{O}_2$  flow and then purged under He for 0.5 h. Initial  $\text{CH}_4$  oxidation: 0.5 h under  $2400 \text{ mL h}^{-1} \text{g}_{\text{cat}}^{-1}$   $\text{CH}_4$ . Reaction conditions:  $T = 483 \text{ K}$ ,  $\text{WHSV} = 2400 \text{ mL h}^{-1} \text{g}_{\text{cat}}^{-1}$ ,  $P_{\text{CH}_4} = 98.1 \text{ kPa}$ ,  $P_{\text{H}_2\text{O}} = 3.2 \text{ kPa}$ ,  $P_{\text{O}_2} = 0.0025 \text{ kPa}$  (25 ppm).  $E_a^{\text{app}}$  = apparent activation energy in kJ/mol for each zeolite.  $\pm$  denotes 95% confidence intervals

Section S11: CH<sub>4</sub> Oxidation vs. Temperature over Cu-Na-SSZ-13 (Cu/Al = 0.50)

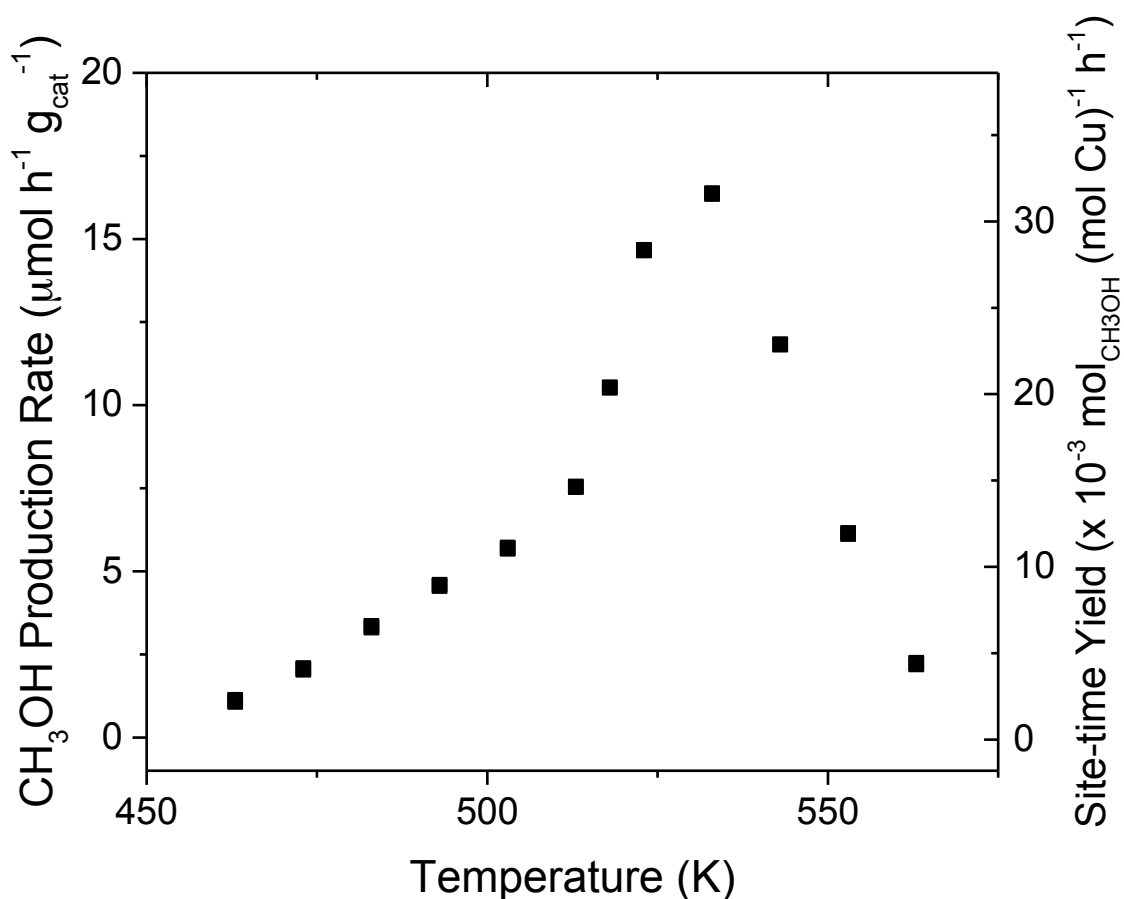

**Figure S17. Catalytic CH<sub>4</sub> oxidation over Cu-Na-SSZ-13 (Cu/Al = 0.50) as a function of reaction temperature.**

Catalyst pretreatment: 5 h at 823 K under flowing O<sub>2</sub>, cooled to 483 K under O<sub>2</sub> flow and then purged under He for 0.5 h. Initial CH<sub>4</sub> oxidation: 0.5 h under 2400 mL h<sup>-1</sup> g<sub>cat</sub><sup>-1</sup> CH<sub>4</sub>. Reaction conditions: WHSV = 3600 mL h<sup>-1</sup> g<sub>cat</sub><sup>-1</sup>, P<sub>CH<sub>4</sub></sub> = 88.9 kPa, P<sub>H<sub>2</sub>O</sub> = 3.2 kPa, P<sub>O<sub>2</sub></sub> = 0.088 kPa, He balance. Error bars denote 95% confidence intervals.

**Section S12: CH<sub>4</sub> Oxidation over CuO<sub>x</sub>-Zeolites Prepared by Incipient Wetness Impregnation**

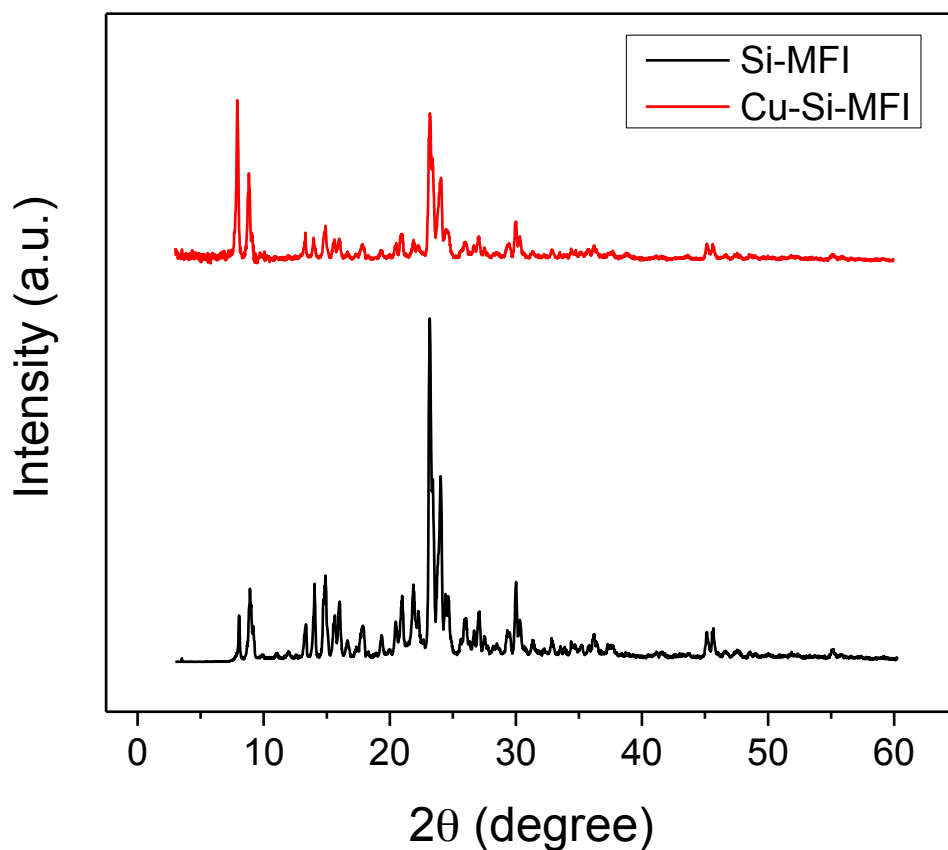

**Figure S18. Powder x-ray diffraction pattern of CuO<sub>x</sub>-Si-MFI (1.1 wt% Cu).** No reflections for CuO nor Cu<sub>2</sub>O could be detected in the diffraction pattern.

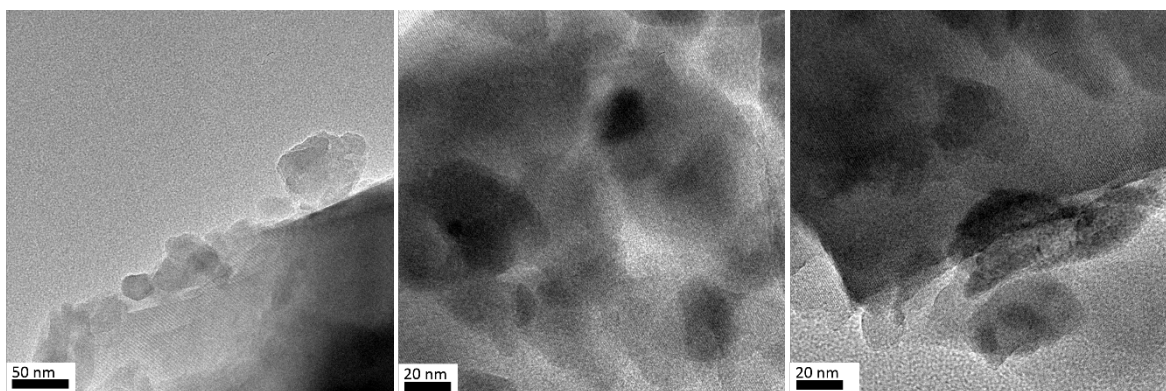

**Figure S19. TEM Images of CuO<sub>x</sub>-Si-MFI (1.1 wt% Cu).** Large CuO<sub>x</sub> particles are observed with average size  $30 \pm 20$  nm.



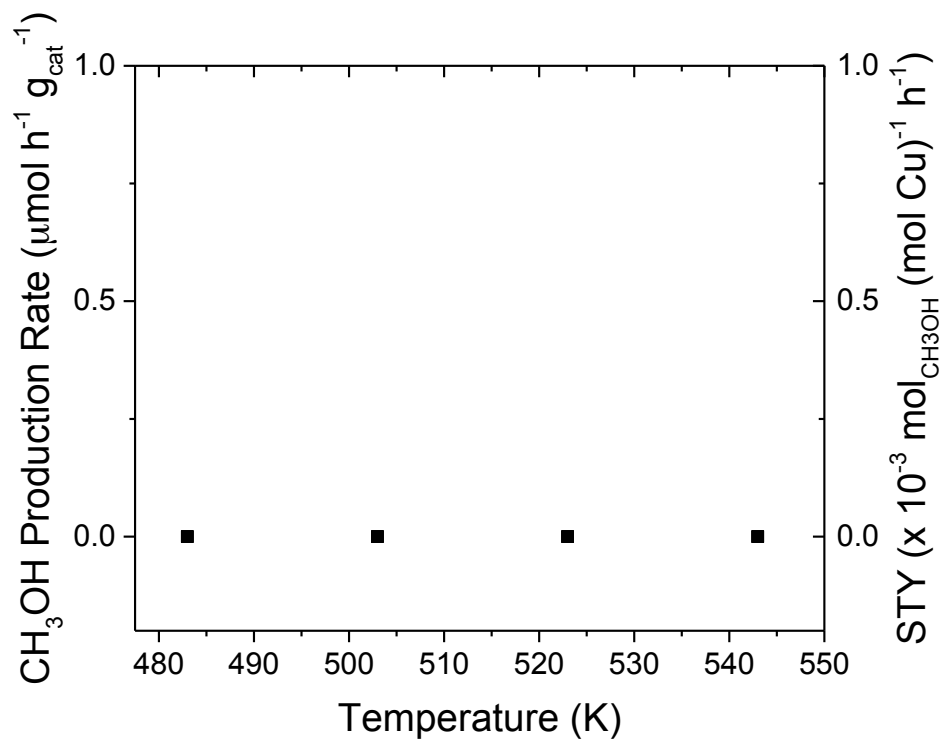

**Figure S20. Catalytic CH<sub>4</sub> oxidation over CuO<sub>x</sub>-MFI (1.1 wt% Cu) as a function of reaction temperature.**

Catalyst pretreatment: 5 h at 823 K under flowing O<sub>2</sub>, cooled to 483 K under O<sub>2</sub> flow and then purged under He for 0.5 h. Initial CH<sub>4</sub> oxidation: 0.5 h under 2400 mL h<sup>-1</sup> g<sub>cat</sub><sup>-1</sup> CH<sub>4</sub>. Reaction conditions: WHSV = 2400 mL h<sup>-1</sup> g<sub>cat</sub><sup>-1</sup>, P<sub>CH<sub>4</sub></sub> = 93.1 kPa, P<sub>H<sub>2</sub>O</sub> = 3.2 kPa, P<sub>O<sub>2</sub></sub> = 0.051 kPa, He balance.

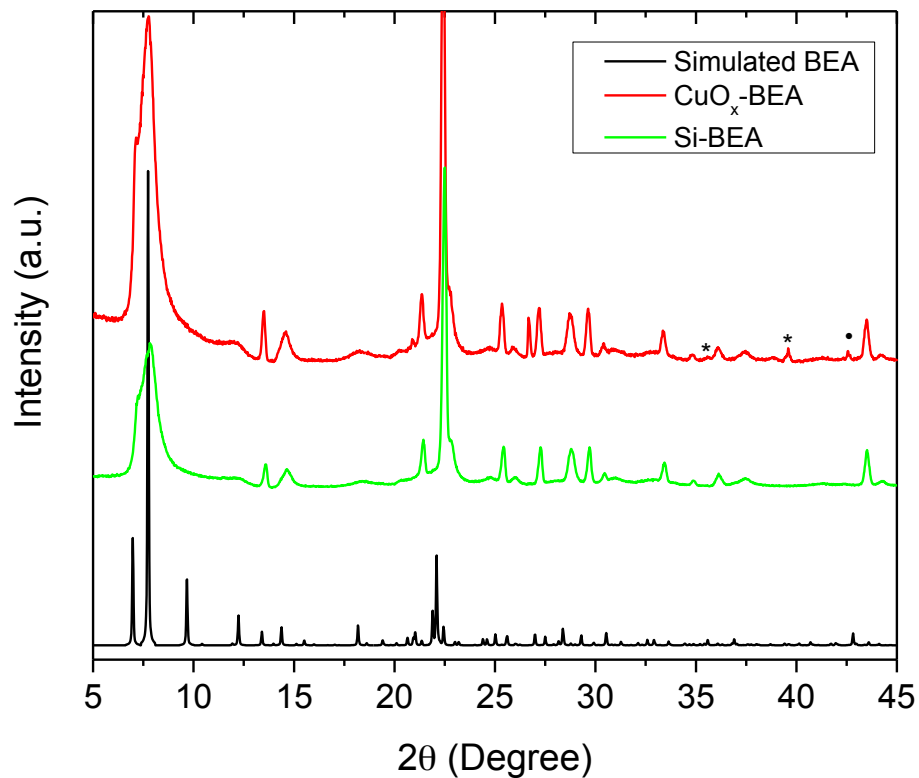

**Figure S21. Powder x-ray diffraction patterns of CuO<sub>x</sub>-BEA (1.1 wt% Cu).**

\* denotes reflections of CuO and • denotes reflections of Cu<sub>2</sub>O.<sup>9</sup> The average CuO particle size was estimated to be 41 nm for CuO ( $2\theta = 39.6^\circ$ ) and 60 nm for Cu<sub>2</sub>O ( $2\theta = 42.6^\circ$ ) using the Sherrer equation.

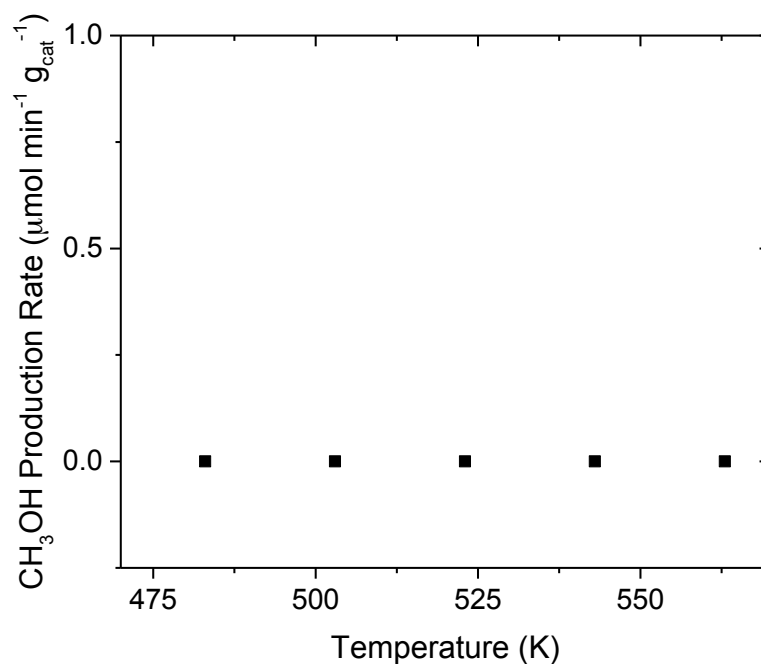

**Figure S22. Catalytic CH<sub>4</sub> oxidation over CuO<sub>x</sub>-BEA (1.1 wt% Cu) as a function of reaction temperature.**

Catalyst pretreatment: 5 h at 823 K under flowing O<sub>2</sub>, cooled to 483 K under O<sub>2</sub> flow and then purged under He for 0.5 h. Initial CH<sub>4</sub> oxidation: 0.5 h under 2400 mL h<sup>-1</sup> g<sub>cat</sub><sup>-1</sup> CH<sub>4</sub>. Reaction conditions: WHSV = 2420 mL h<sup>-1</sup> g<sub>cat</sub><sup>-1</sup>, P<sub>CH<sub>4</sub></sub> = 93.1 kPa, P<sub>H<sub>2</sub>O</sub> = 3.2 kPa, P<sub>O<sub>2</sub></sub> = 0.051 kPa, He balance.

## Section S13: Materials Characterization

**Table S2. Elemental composition, pore volume and surface area analysis (BET) of Cu-exchanged zeolites**

| Material <sup>a</sup> | Framework | Si/Al <sup>b</sup> | Si/Al <sub>tot</sub> <sup>c</sup> | Cu/Al <sup>d</sup> | Cu wt% <sup>e</sup> | Fe/Al <sup>f</sup> | V <sub>micro</sub> (cm <sup>3</sup> g <sub>cat</sub> <sup>-1</sup> ) <sup>g</sup> |
|-----------------------|-----------|--------------------|-----------------------------------|--------------------|---------------------|--------------------|-----------------------------------------------------------------------------------|
| Na-ZSM-5              | MFI       | 11.5               | 13.6                              | 0.37               | 2.5                 | 0.01               | 0.14                                                                              |
| Na-ZSM-5              | MFI       | 11.5               | 13.1                              | 0.17               | 1.2                 | 0.01               | 0.14                                                                              |
| H-ZSM-5               | MFI       | 11.5               | 13.2                              | 0.31               | 2.2                 | 0.01               | 0.14                                                                              |
| H-ZSM-5               | MFI       | 11.5               | 13.9                              | 0.13               | 0.9                 | 0.01               | 0.15                                                                              |
| H-ZSM-5               | MFI       | 11.5               | 12.9                              | 0                  | 0                   | 0.00               | 0.16                                                                              |
| Na-MOR                | MOR       | 10                 | 11.4                              | 0.14               | 1.1                 | 0.01               | 0.17                                                                              |
| H-MOR                 | MOR       | 10                 | 11.1                              | 0.14               | 1.1                 | 0.01               | 0.19                                                                              |
| H-MOR                 | MOR       | 10                 | 10.4                              | 0                  | 0                   | 0.00               | 0.20                                                                              |
| Na-SSZ-13             | CHA       | 15                 | 13.8                              | 0.50               | 3.3                 | 0.00               | 0.24                                                                              |

<sup>a</sup> zeolite material with parent counter cation form before copper-exchange. Na denotes sodium form, H denotes proton form.

<sup>b</sup> nominal ratio of total silicon to aluminum atoms in the zeolite based on commercial figures or ratios of SiO<sub>2</sub> to Al<sub>2</sub>O<sub>3</sub> in synthesis procedures.

<sup>c</sup> calculated ratio of total silicon to aluminum atoms in the zeolite. Quantified using inductively coupled plasma mass spectrometry (ICP-MS).

<sup>d</sup> calculated ratio of total copper to aluminum atoms in copper-exchanged zeolite. Quantified using ICP-MS.

<sup>e</sup> weight percent of copper in copper-exchanged zeolite.

<sup>f</sup> calculated ratio of total iron to aluminum atoms in copper-exchanged zeolite. Quantified using ICP-MS. Fe/Al was quantified to provide an estimate of iron impurities in copper-exchanged zeolites.

<sup>g</sup> micropore volume of copper-exchanged zeolites determined by BET analysis.

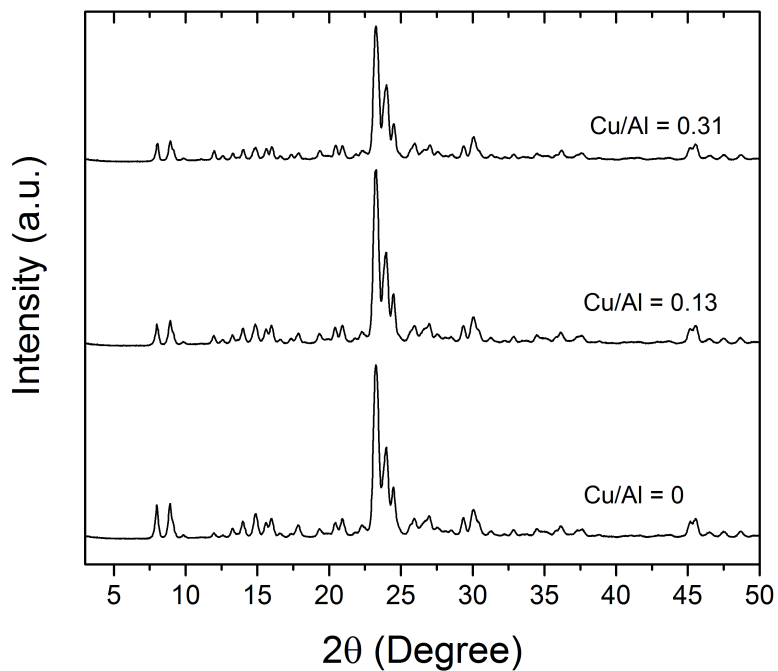

**Figure S23. Powder x-ray diffraction patterns of Cu-exchanged H-ZSM-5 (Si/Al = 12.9 – 13.9) catalysts.**

After ion exchange, drying, and calcination, no reflections were observed corresponding to copper or copper oxide particles (< 3 nm)

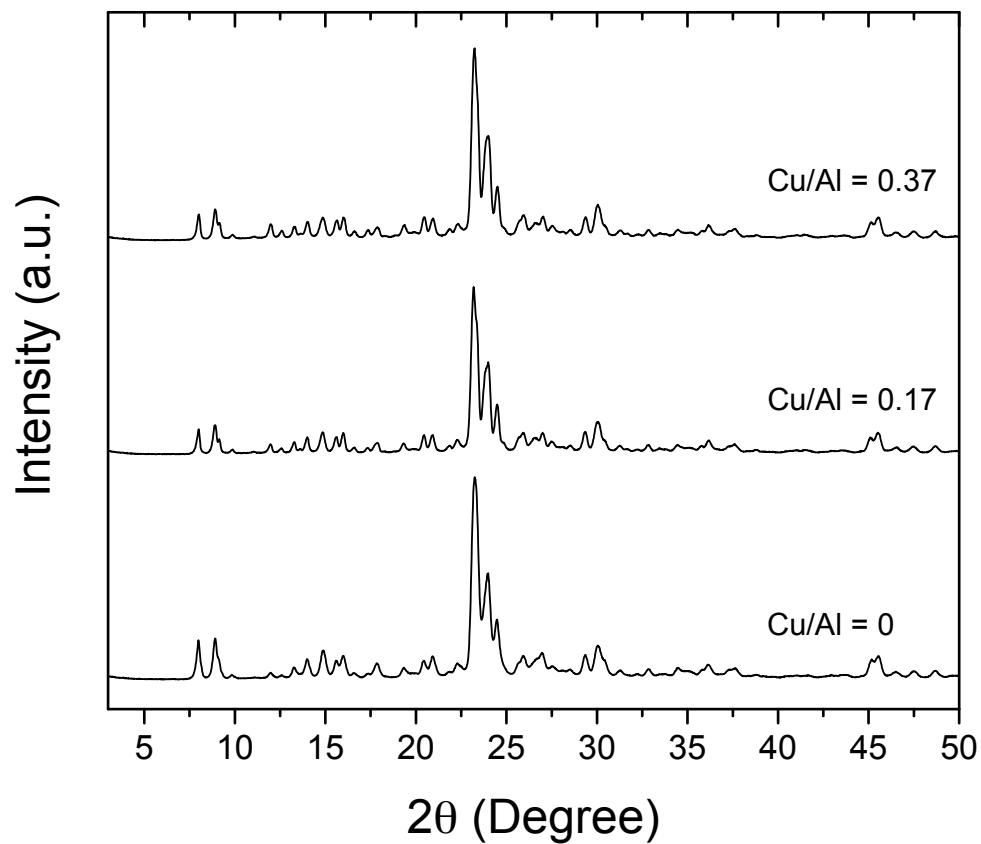

**Figure S24. Powder x-ray diffraction patterns of Cu-exchanged Na-ZSM-5 (Si/Al = 12.9 – 13.6) catalysts.**

After ion exchange, drying, and calcination, no reflections were observed corresponding to copper or copper oxide particles (< 3 nm)

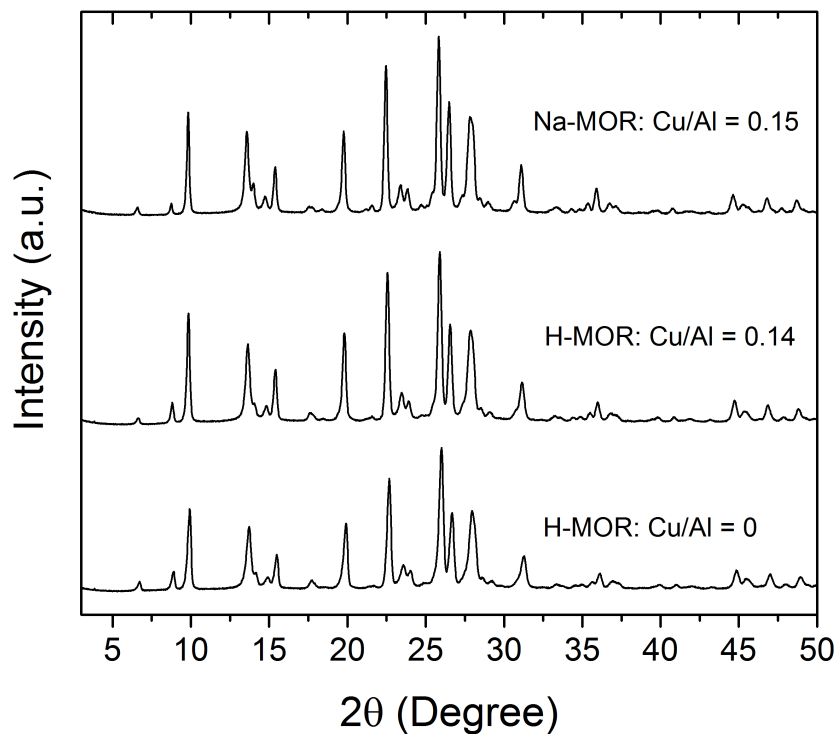

**Figure S25. Powder x-ray diffraction patterns of Cu-exchanged MOR (Si/Al = 10.4 – 11.4) catalysts.**

After ion exchange, drying, and calcination, no reflections were observed corresponding to copper or copper oxide particles (< 3 nm)

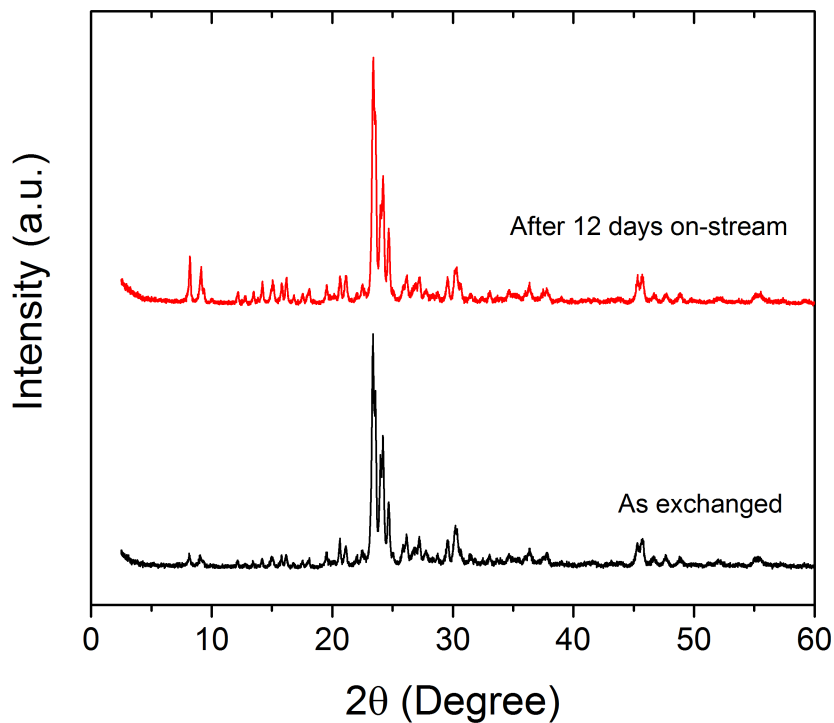

**Figure S26. Powder x-ray diffraction of Cu-H-ZSM-5 (Cu/Al = 0.31) after exchange and after CH<sub>4</sub> oxidation for 12 days-on-stream.**

## References

- (1) Cambor, M. A.; Corma, A.; Valencia, S. Spontaneous nucleation and growth of pure silica zeolite- $\beta$  free of connectivity defects. *Chem. Commun.* **1996**, 2365-2366.
- (2) Persson, A.; Schoeman, B.; Sterte, J.; Otterstedt, J.-E. The synthesis of discrete colloidal particles of TPA-silicalite-1. *Zeolites* **1994**, *14*, 557-567.
- (3) Baerlocher, C.; McCusker, L. B. Database of Zeolite Structures. <http://www.iza-structure.org/databases/>
- (4) Yaripour, F.; Baghaei, F.; Schmidt, I.; Perregaard, J. Catalytic dehydration of methanol to dimethyl ether (DME) over solid-acid catalysts. *Catal. Commun.* **2005**, *6*, 147-152.
- (5) Blaszkowski, S. R.; van Santen, R. A. The mechanism of dimethyl ether formation from methanol catalyzed by zeolitic protons. *J. Am. Chem. Soc.* **1996**, *118*, 5152-5153.
- (6) Wang, W.; Seiler, M.; Hunger, M. Role of surface methoxy species in the conversion of methanol to dimethyl ether on acidic zeolites investigated by in situ stopped-flow MAS NMR spectroscopy. *J. Phys. Chem. B* **2001**, *105*, 12553-12558.
- (7) Hassanpour, S.; Yaripour, F.; Taghizadeh, M. Performance of modified H-ZSM-5 zeolite for dehydration of methanol to dimethyl ether. *Fuel Process. Technol.* **2010**, *91*, 1212-1221.
- (8) Vishwanathan, V.; Jun, K.-W.; Kim, J.-W.; Roh, H.-S. Vapour phase dehydration of crude methanol to dimethyl ether over Na-modified H-ZSM-5 catalysts. *Appl. Catal., A* **2004**, *276*, 251-255.
- (9) Song, Q.; Liu, W.; Bohn, C. D.; Harper, R. N.; Sivaniah, E.; Scott, S. A.; Dennis, J. S. A high performance oxygen storage material for chemical looping processes with CO<sub>2</sub> capture. *Energy Environ. Sci.* **2013**, *6*, 288-298.
